# Supplementary material
Source: PubMed Central journal article supplement (PMC3376494)
Supplement: mmc1.pdf [file mmc1.pdf]

**The American Journal of Human Genetics, Volume 90**

## **Supplemental Data**

Mitochondrial DNA Signals

of Late Glacial Recolonization of Europe

from Near Eastern Refugia

**Maria Pala, Anna Olivieri, Alessandro Achilli, Matteo Accetturo, Ene Metspalu, Maere Reidla, Erika Tamm, Monika Karmin, Tuuli Reisberg, Baharak Hooshiar Kashani, Ugo A. Perego, Valeria Carossa, Francesca Gandini, Joana B. Pereira, Pedro Soares, Norman Angerhofer, Sergei Rychkov, Nadia Al-Zahery, Valerio Carelli, Mohammad Hossein Sanati, Massoud Houshmand, Jiří Hatina, Vincent Macaulay, Luísa Pereira, Scott R. Woodward, William Davies, Clive Gamble, Douglas Baird, Ornella Semino, Richard Villems, Antonio Torroni, and Martin B. Richards**

**Figure S1.** Maximum-Parsimony Phylogenetic Tree of 451 Complete mtDNA Sequences Belonging to Haplogroup J

**Figure S2.** Maximum-Parsimony Phylogenetic Tree of 451 Complete mtDNA Sequences Belonging to Haplogroup T

**Figure S3.** Frequency Distribution Maps and Corresponding HVS-I Networks Obtained for Haplogroups J (and Subclades) and T (and Subclades)

**Table S1.** Origin and Subhaplogroup Affiliation of the Hg J mtDNA Complete Sequences Considered in this Study (.xls)

**Table S2.** Origin and Subhaplogroup Affiliation of the Hg T mtDNA Complete Sequences Considered in this Study (.xls)

**Table S3.** Dataset of 37,239 Samples, from 106 Populations, Used to Generate Frequency Maps for T and Subclades and J, J1, and J2 (.xls)

**Table S4.** Dataset of 29,710 Samples, from 83 Populations, Used to Generate Frequency Maps for J1b'c'd and J2a'b Clades (.xls)

**Table S5.** Diversity Values of JT Lineages Observed in Near East, Eastern, and Western Europe

**Supplemental References**

|                          |
|--------------------------|
| Western Europe           |
| Eastern Europe           |
| North Caucasus           |
| South Caucasus           |
| Near East                |
| North Africa             |
| Central Asia             |
| Indian Subcontinent      |
| USA / Undefined European |
| Unknown                  |

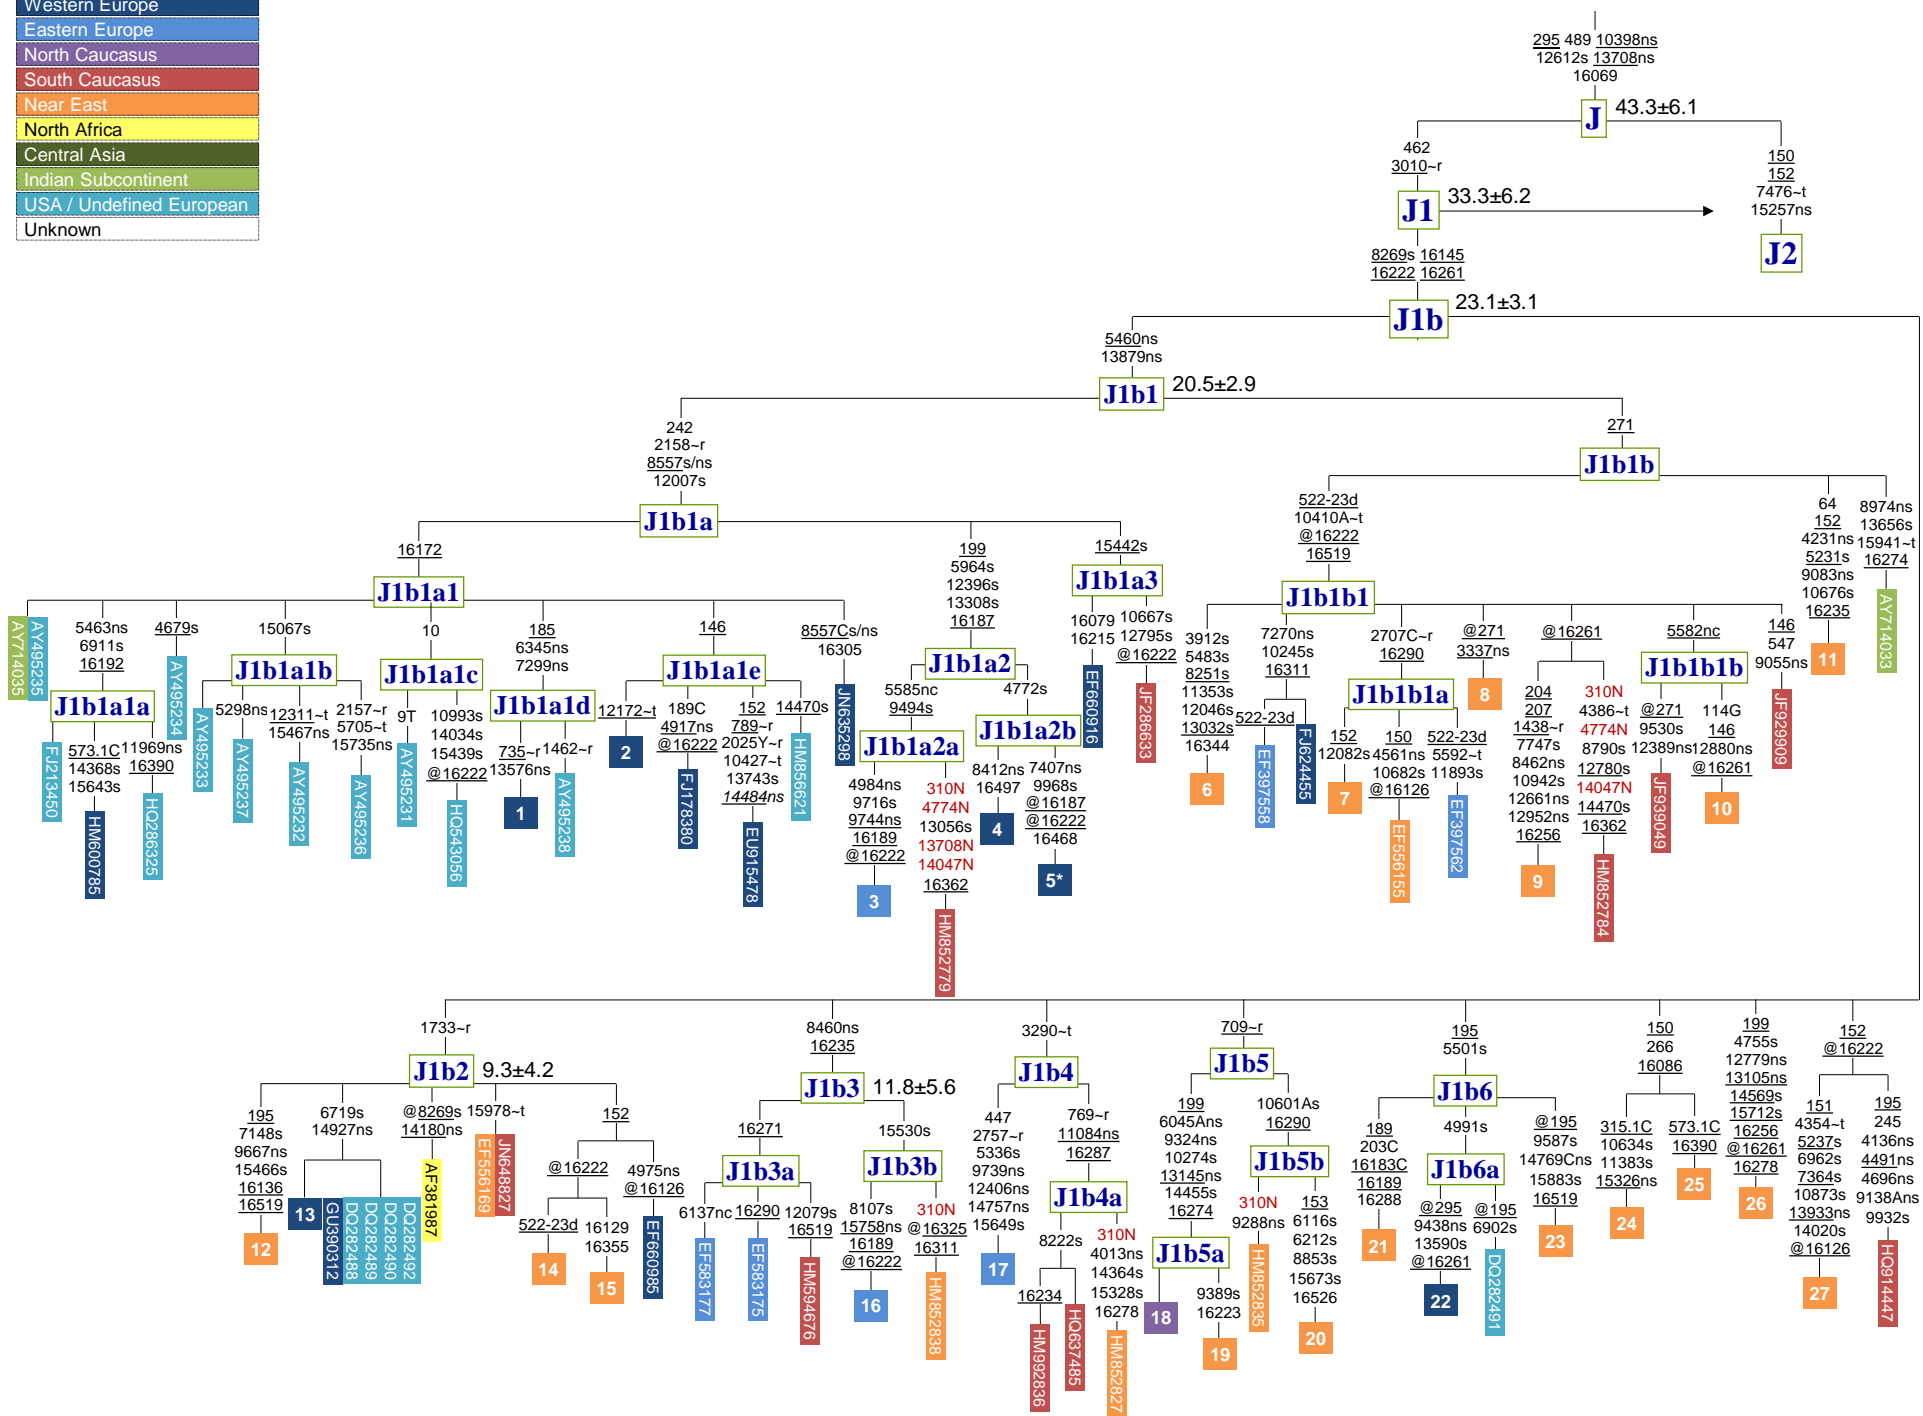

|                          |
|--------------------------|
| Western Europe           |
| Eastern Europe           |
| North Caucasus           |
| South Caucasus           |
| Near East                |
| North Africa             |
| Central Asia             |
| Indian Subcontinent      |
| USA / Undefined European |
| Unknown                  |

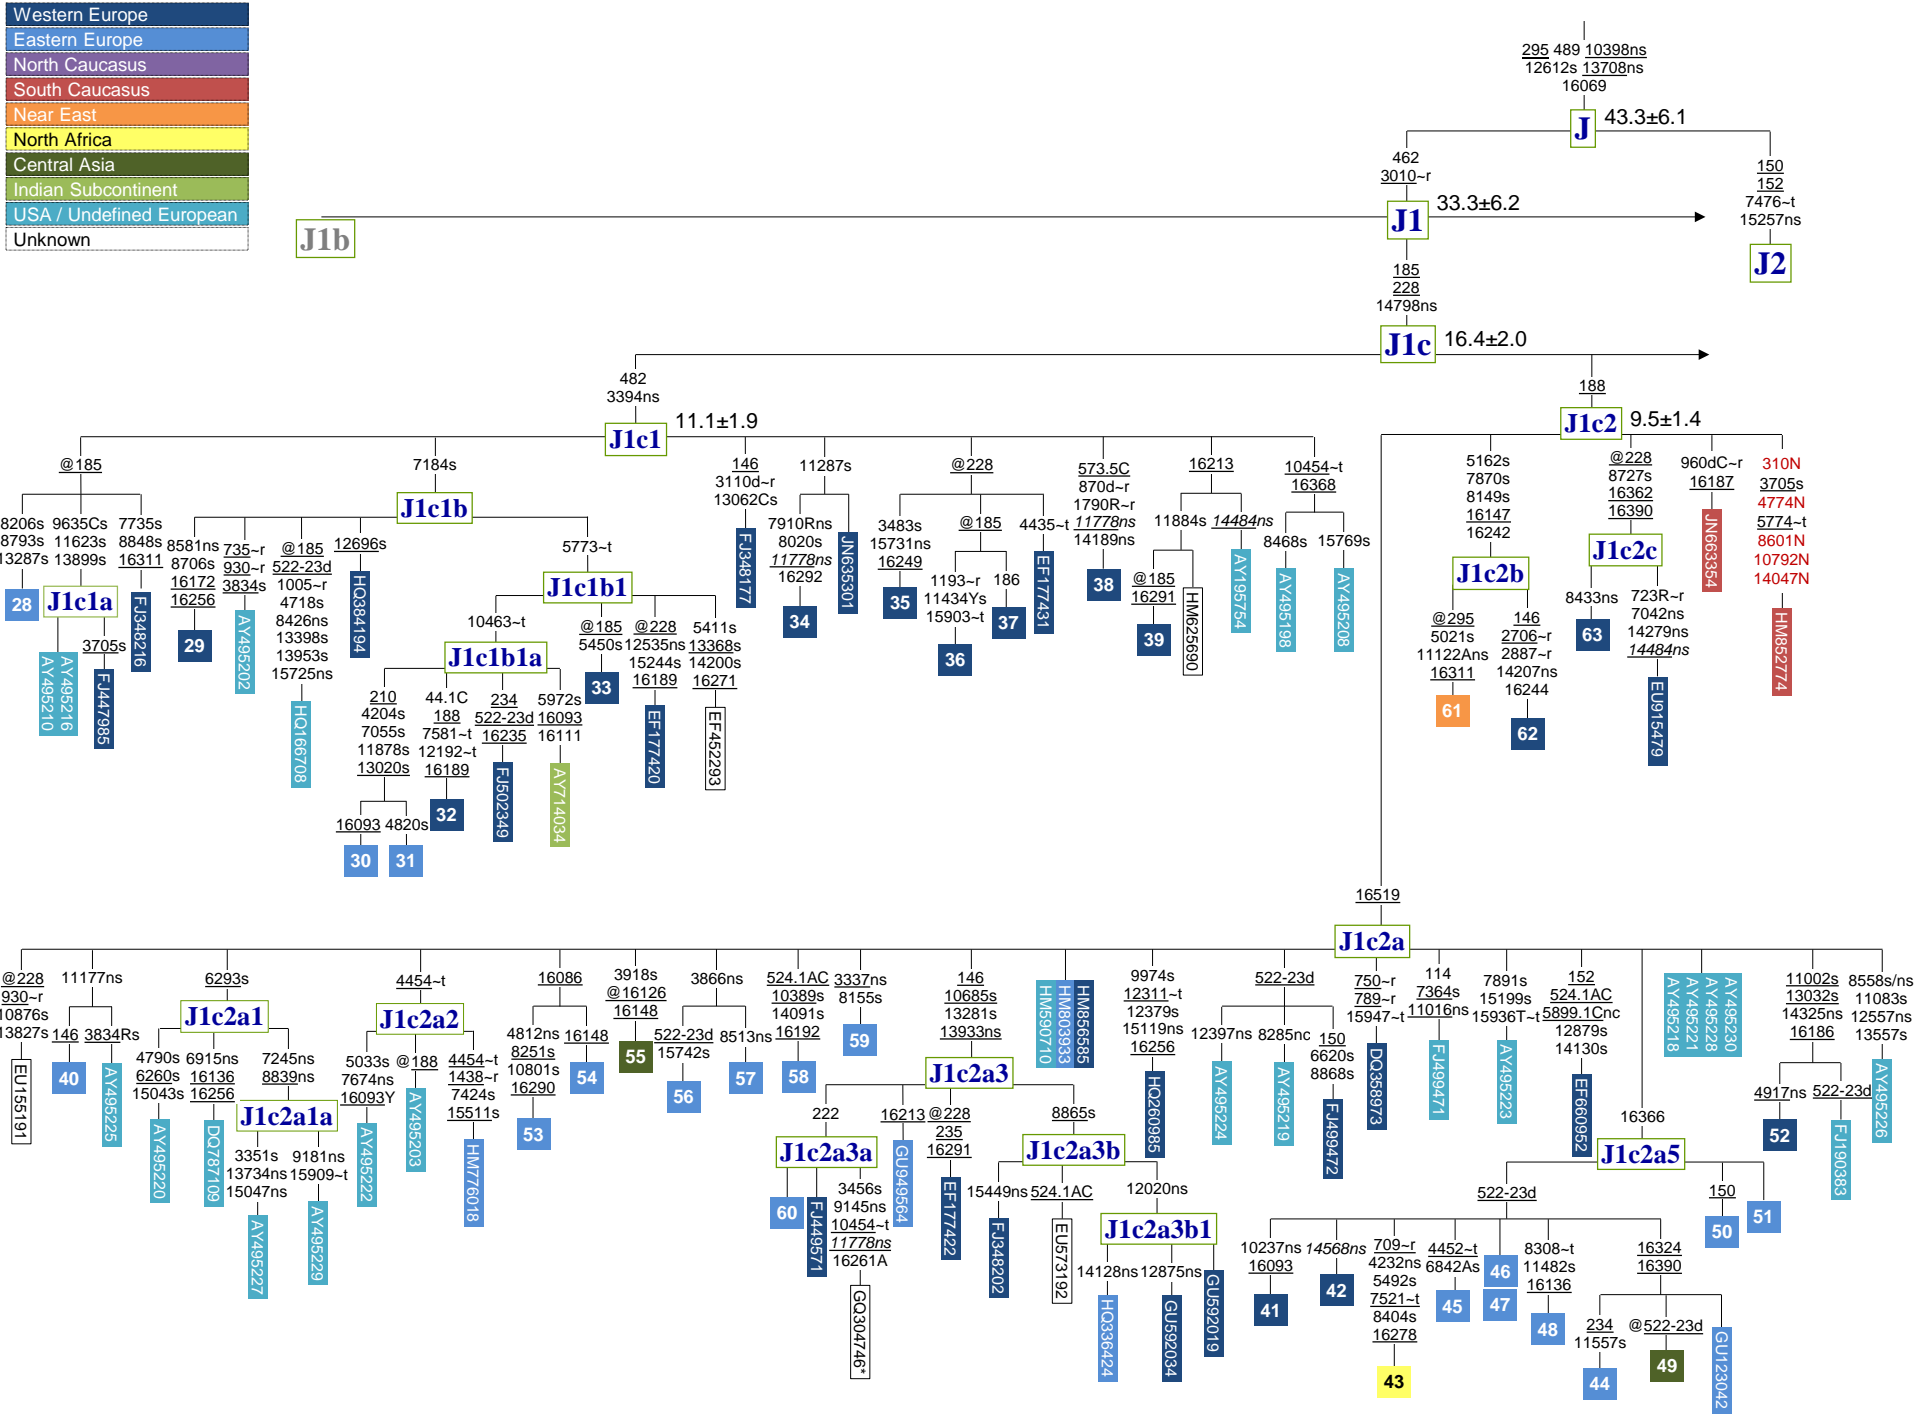



|                          |
|--------------------------|
| Western Europe           |
| Eastern Europe           |
| North Caucasus           |
| South Caucasus           |
| Near East                |
| North Africa             |
| Central Asia             |
| Indian Subcontinent      |
| USA / Undefined European |
| Unknown                  |

J1b

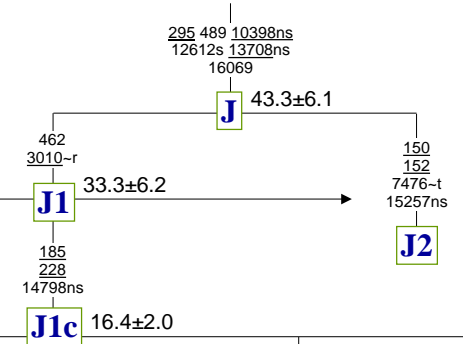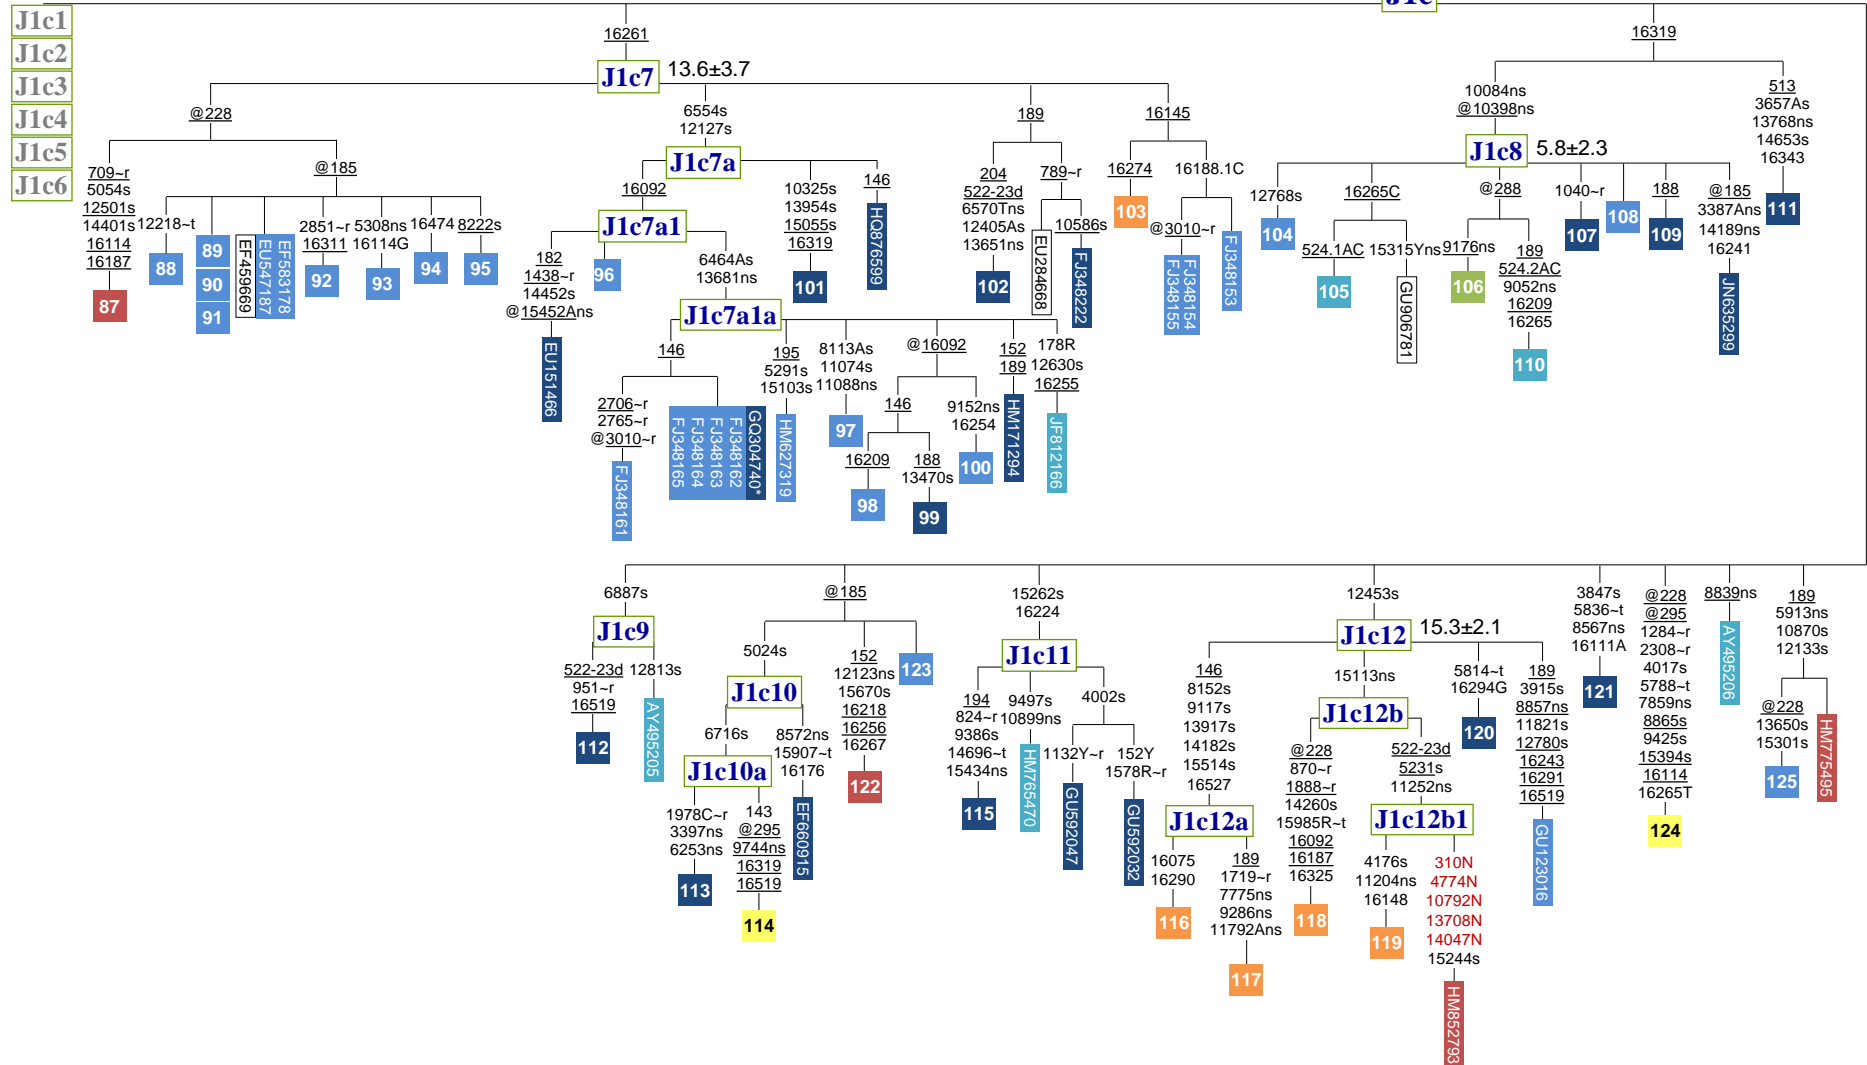

|                          |
|--------------------------|
| Western Europe           |
| Eastern Europe           |
| North Caucasus           |
| South Caucasus           |
| Near East                |
| North Africa             |
| Central Asia             |
| Indian Subcontinent      |
| USA / Undefined European |
| Unknown                  |

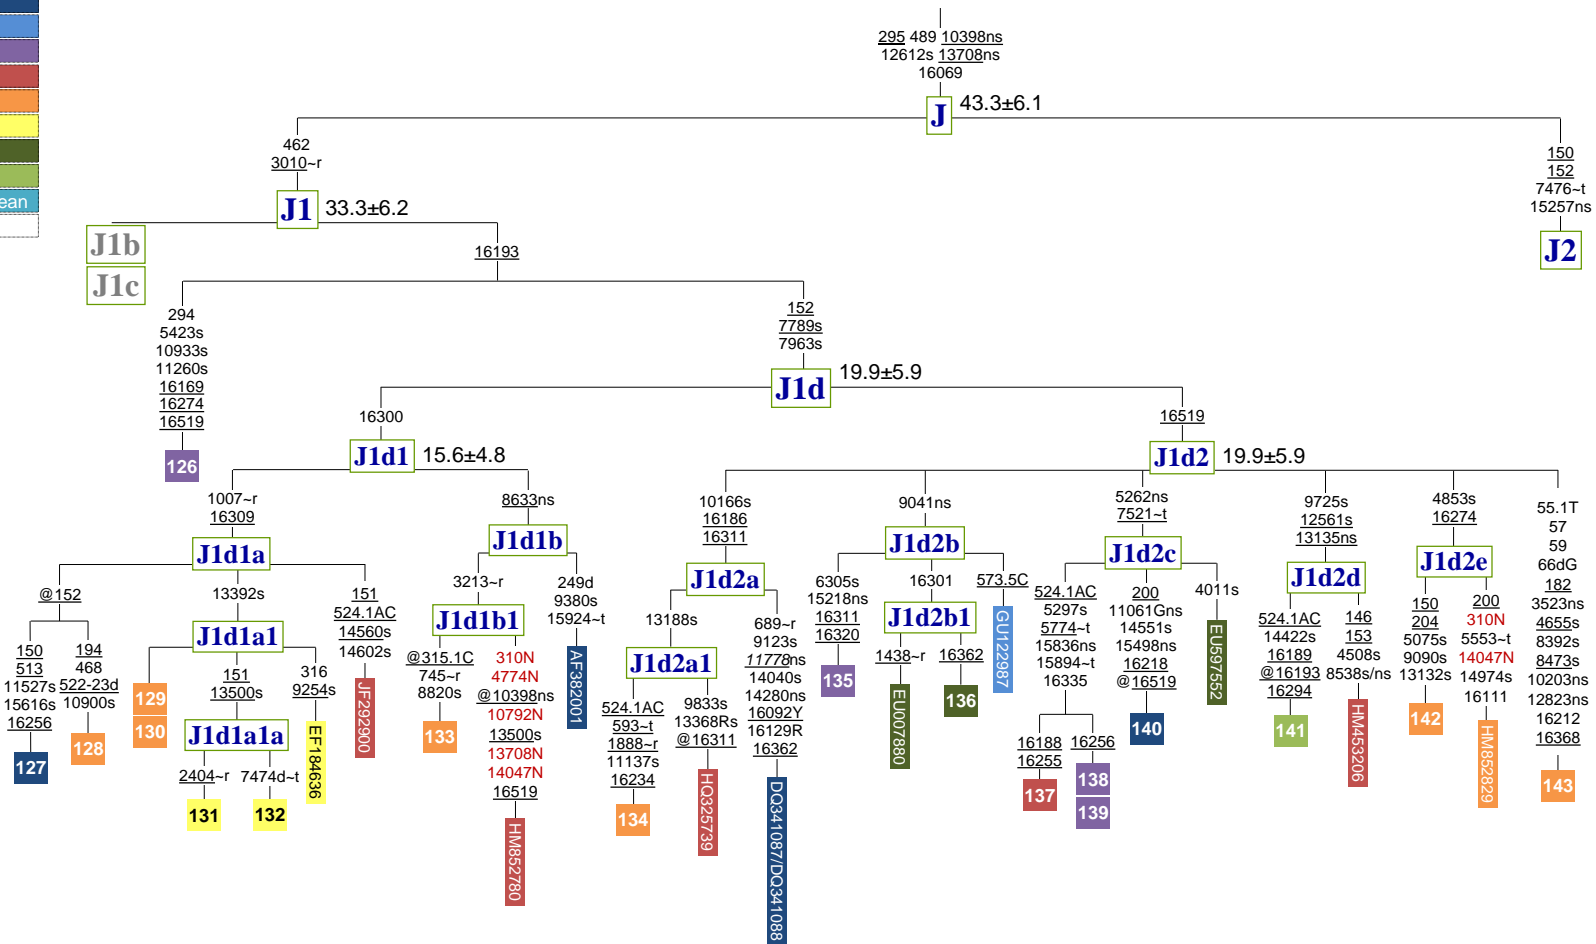

|                          |
|--------------------------|
| Western Europe           |
| Eastern Europe           |
| North Caucasus           |
| South Caucasus           |
| Near East                |
| North Africa             |
| Central Asia             |
| Indian Subcontinent      |
| USA / Undefined European |
| Unknown                  |

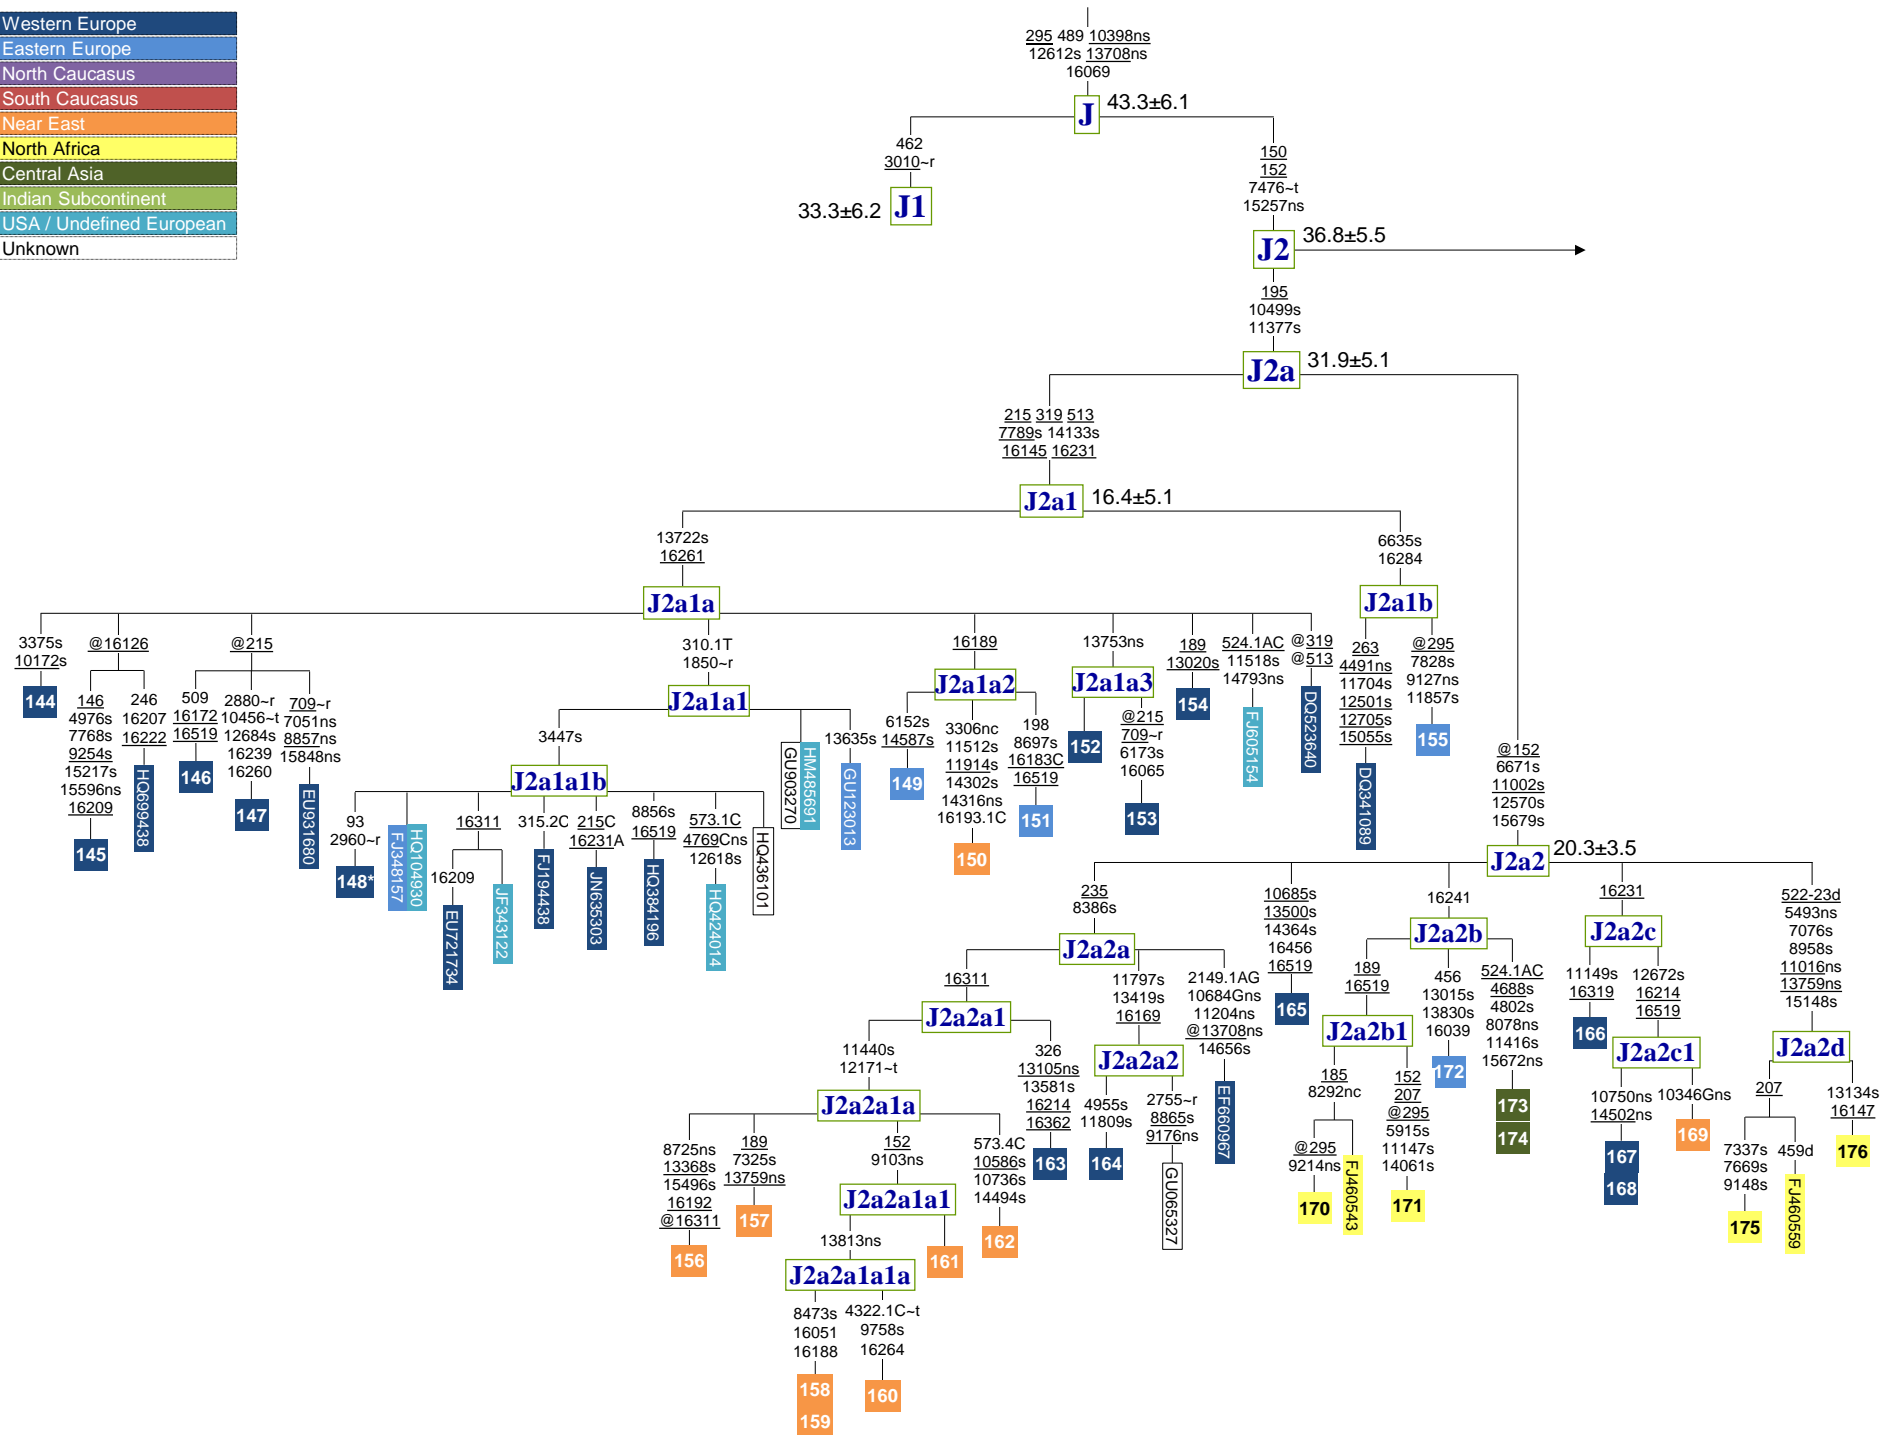



|                          |
|--------------------------|
| Western Europe           |
| Eastern Europe           |
| North Caucasus           |
| South Caucasus           |
| Near East                |
| North Africa             |
| Central Asia             |
| Indian Subcontinent      |
| USA / Undefined European |
| Unknown                  |

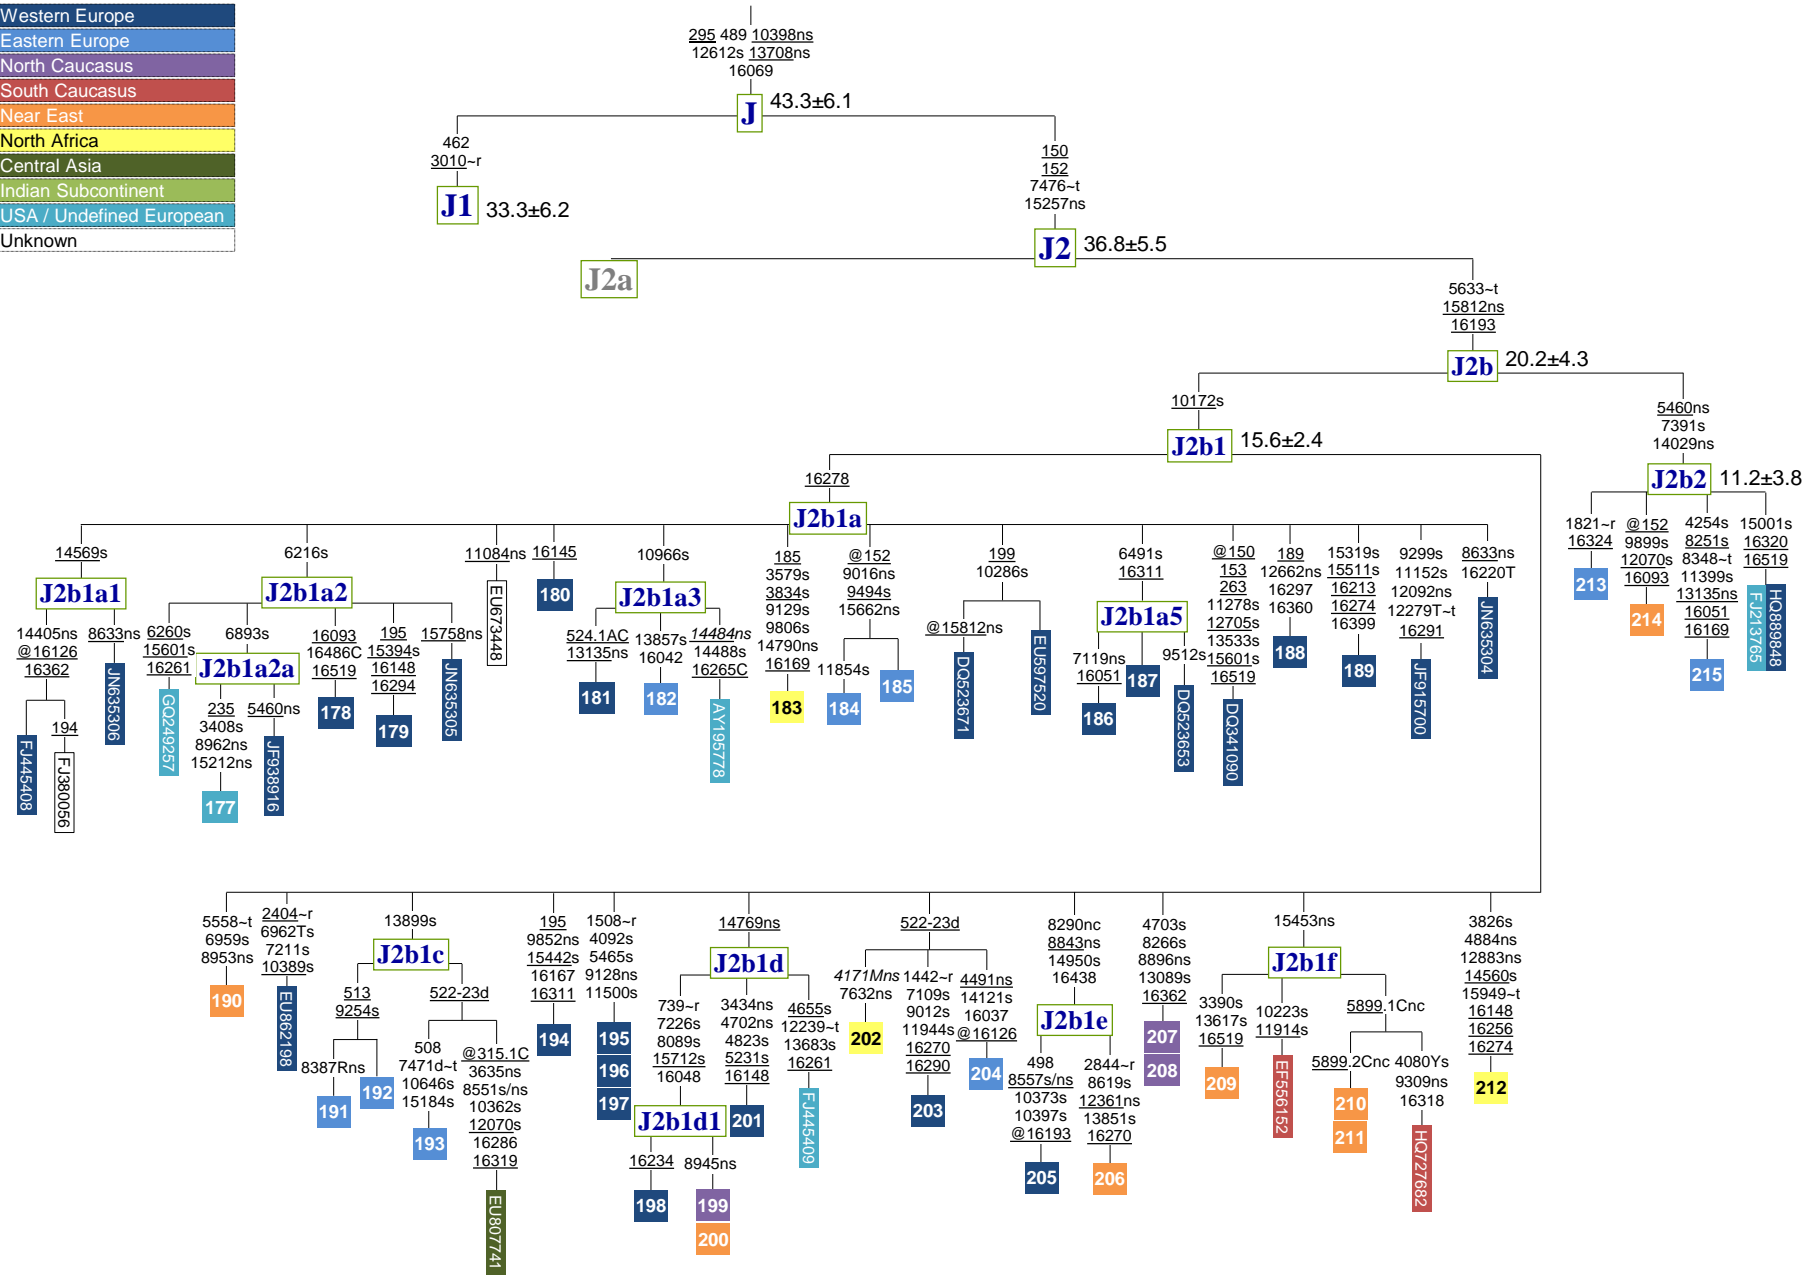

**Figure S1.** Maximum-Parsimony Phylogenetic Tree of 451 Complete mtDNA Sequences Belonging to Haplogroup J

Mutations are shown on the branches; they are transitions unless the base change is explicitly indicated. The prefix “@” designates reversions, whereas suffixes indicate: transversions (to A, G, C, or T), deletions “d”, gene locus (~t, tRNA; ~r, rRNA; ~nc, noncoding region outside of the control region), synonymous or non-synonymous changes (s or ns), and heteroplasmies (R, Y, M). Insertions are also suffixed with a dot followed by a number indicating how many bases were inserted and the inserted nucleotide/s (.1C). Recurrent mutations are underlined. The variation in number of Cs at np 309 was not included in the phylogeny. Italics highlight pathological mutations while brown labels indicate potential phantom mutations or documentation errors that have not been considered for the age calculations. DNA of samples marked with an asterisk (\*) derived from cybrid cell lines. Each rectangle represents a sample, they are numbered according to the order they appear on the tree, while previously published sequences are identified by their GenBank accession number. All the samples are coloured according to their geographic origin, as shown in the legend.



|                          |
|--------------------------|
| Western Europe           |
| Eastern Europe           |
| North Caucasus           |
| South Caucasus           |
| Near East                |
| North Africa             |
| Central Asia             |
| Indian Subcontinent      |
| USA / Undefined European |
| Unknown                  |

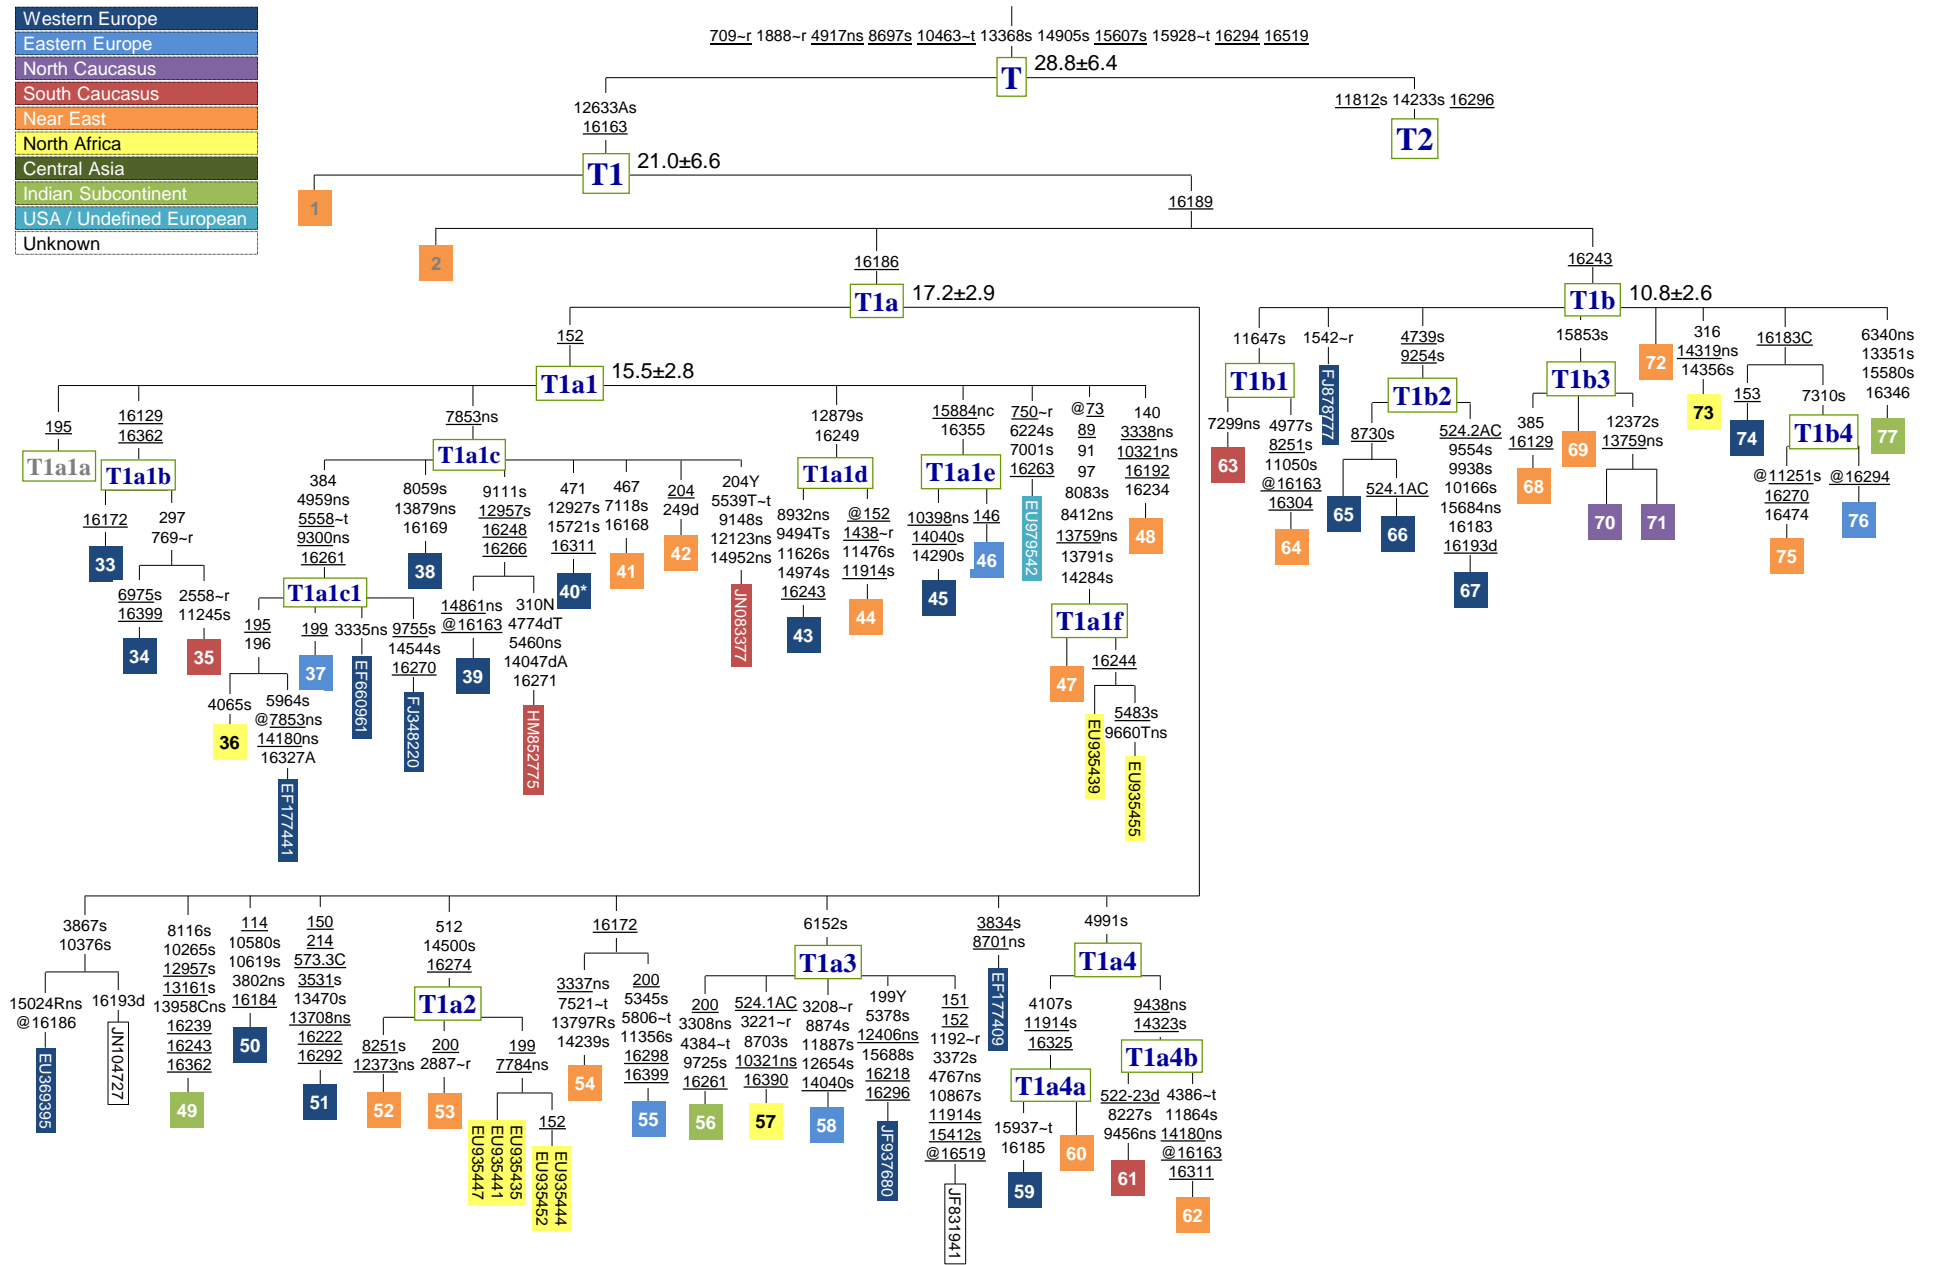

|                          |
|--------------------------|
| Western Europe           |
| Eastern Europe           |
| North Caucasus           |
| South Caucasus           |
| Near East                |
| North Africa             |
| Central Asia             |
| Indian Subcontinent      |
| USA / Undefined European |
| Unknown                  |

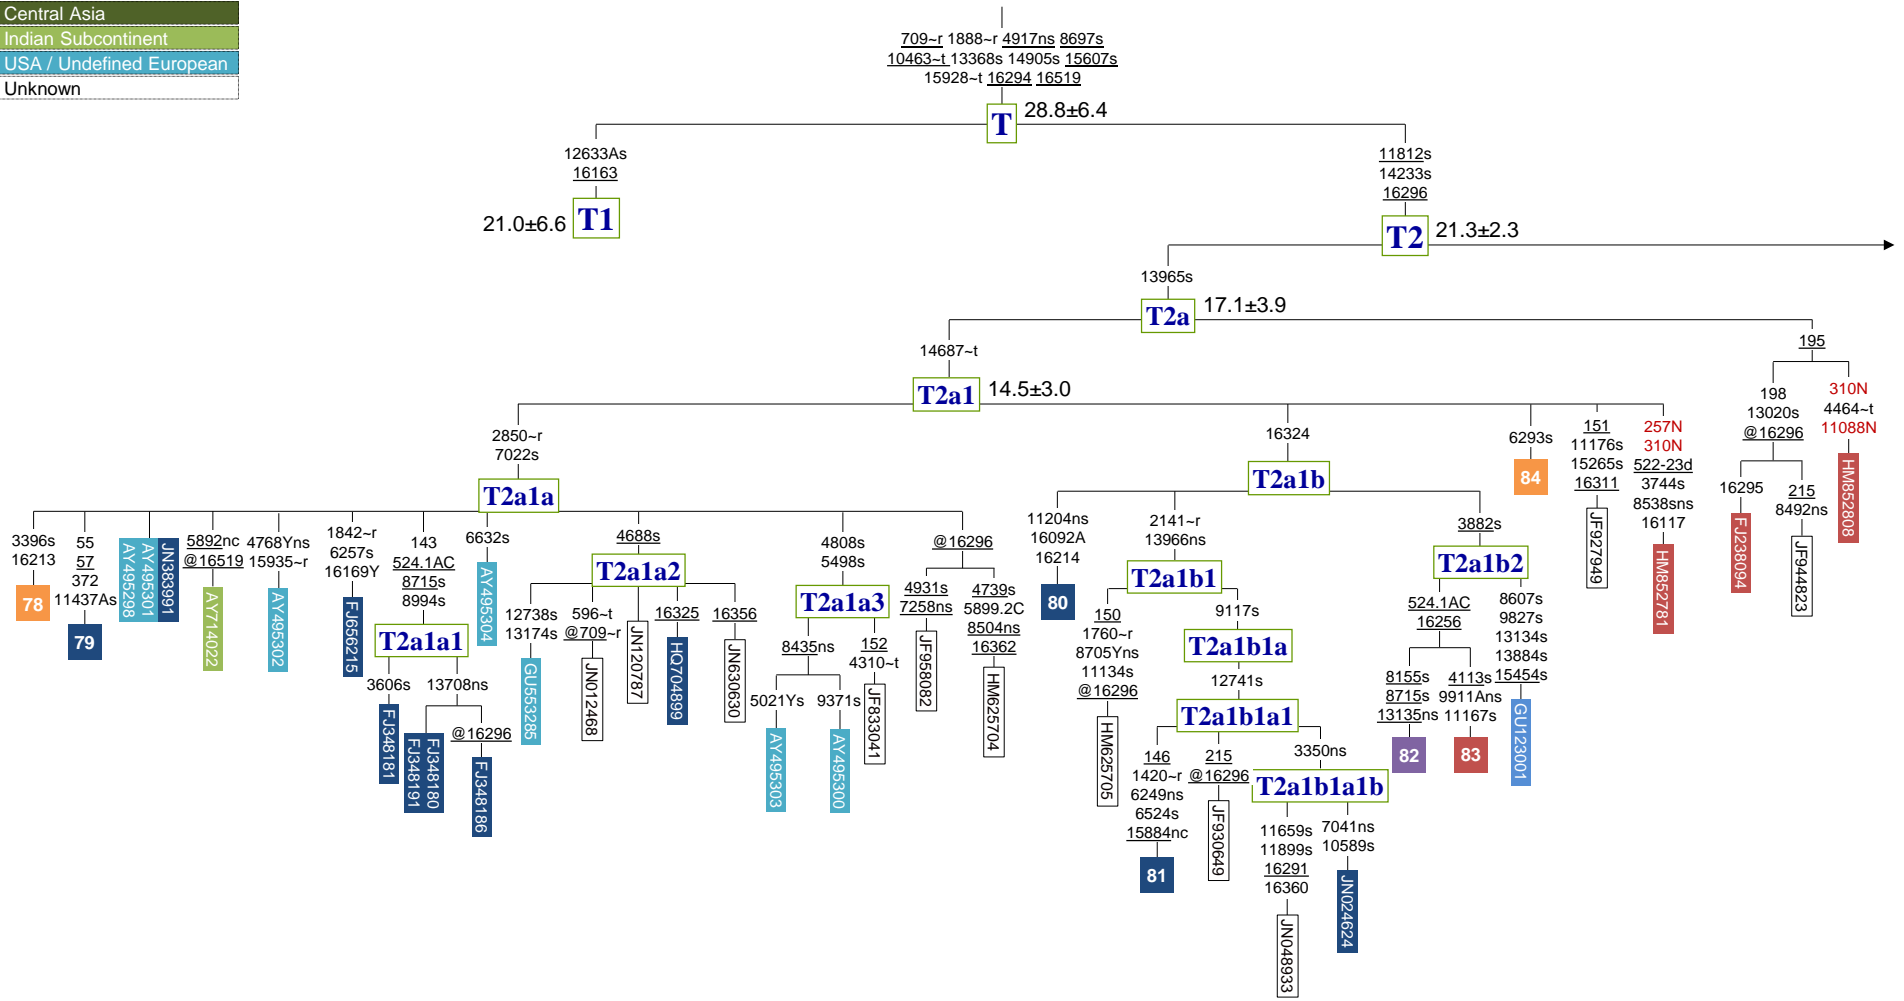

|                          |
|--------------------------|
| Western Europe           |
| Eastern Europe           |
| North Caucasus           |
| South Caucasus           |
| Near East                |
| North Africa             |
| Central Asia             |
| Indian Subcontinent      |
| USA / Undefined European |
| Unknown                  |

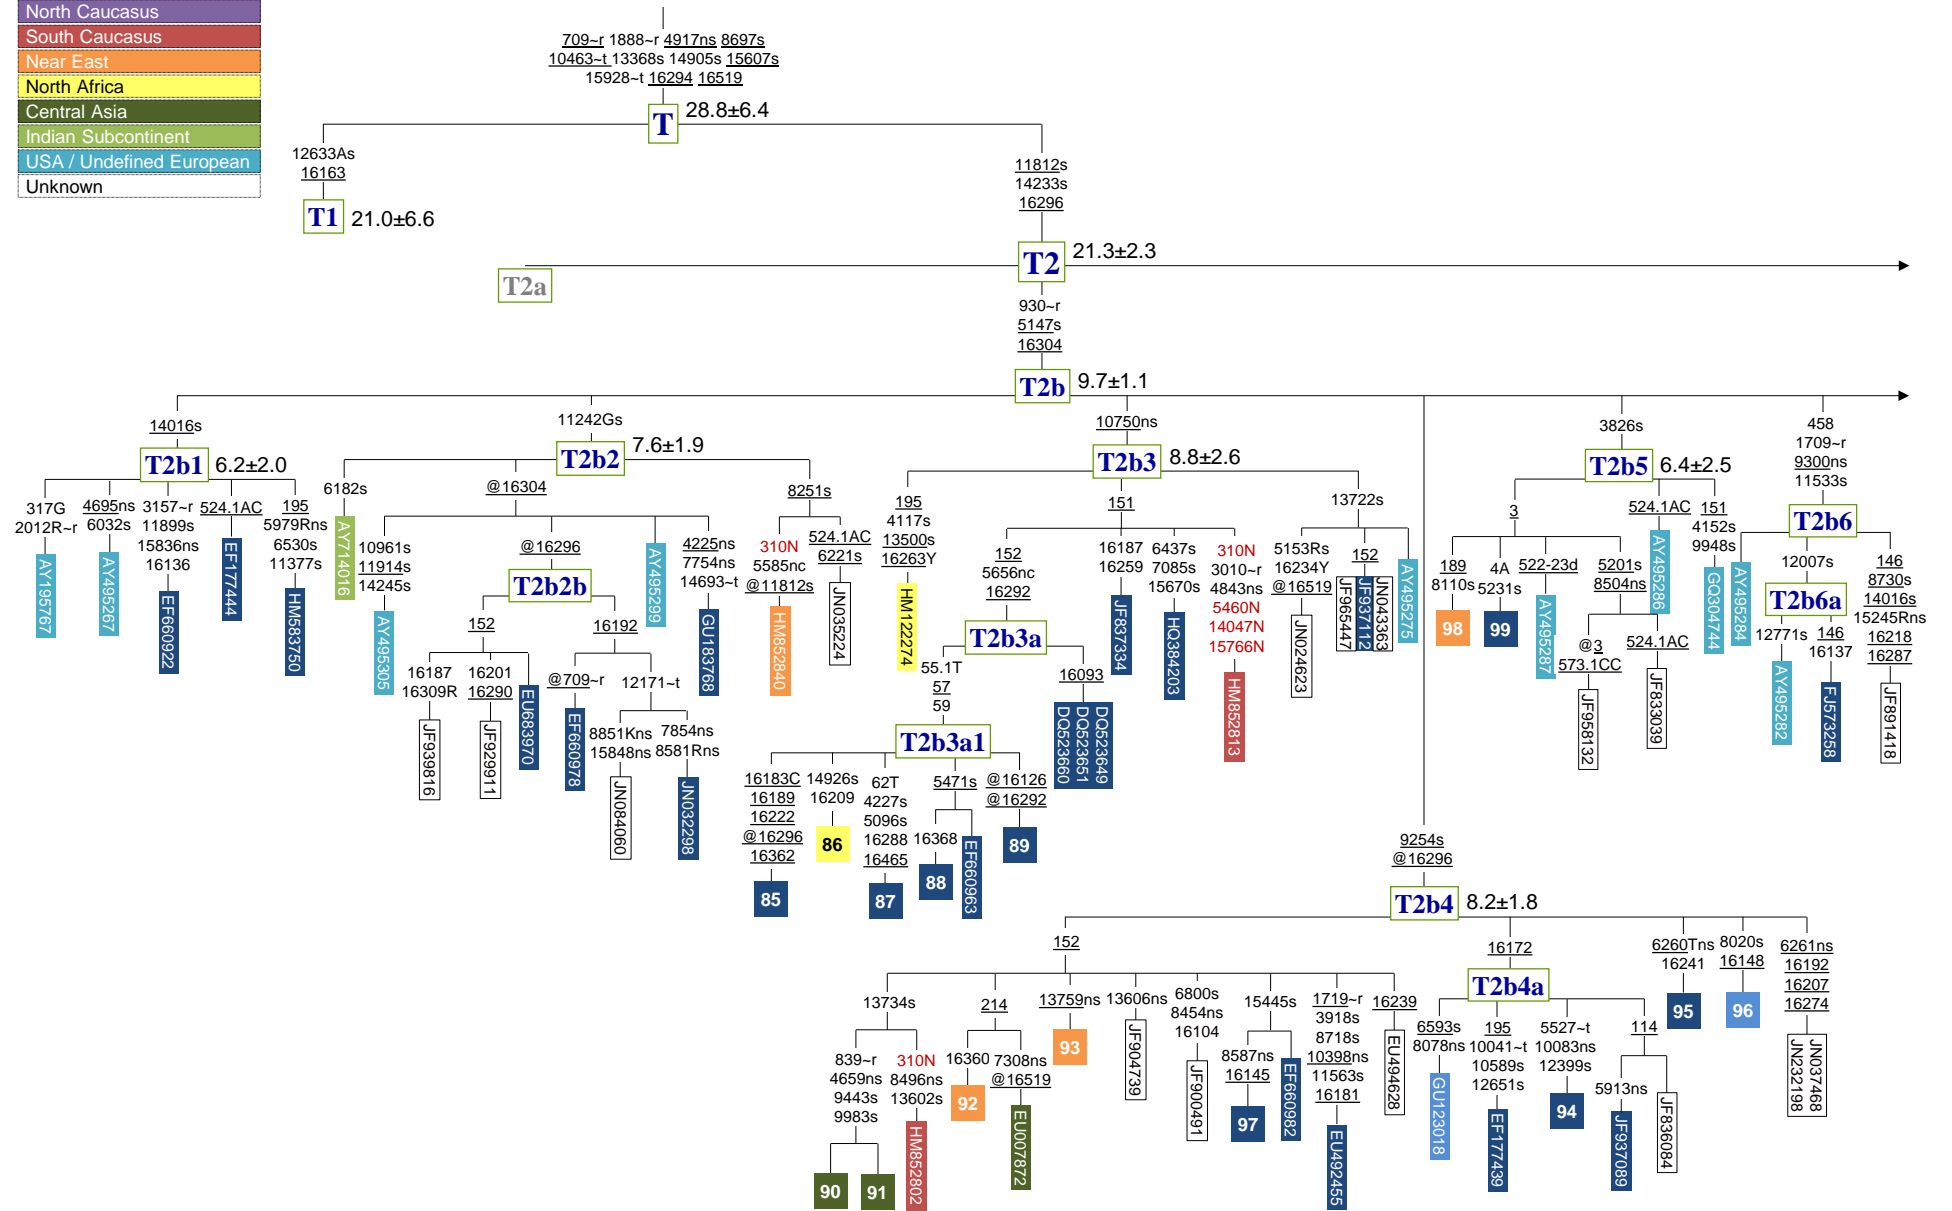

|                          |
|--------------------------|
| Western Europe           |
| Eastern Europe           |
| North Caucasus           |
| South Caucasus           |
| Near East                |
| North Africa             |
| Central Asia             |
| Indian Subcontinent      |
| USA / Undefined European |
| Unknown                  |

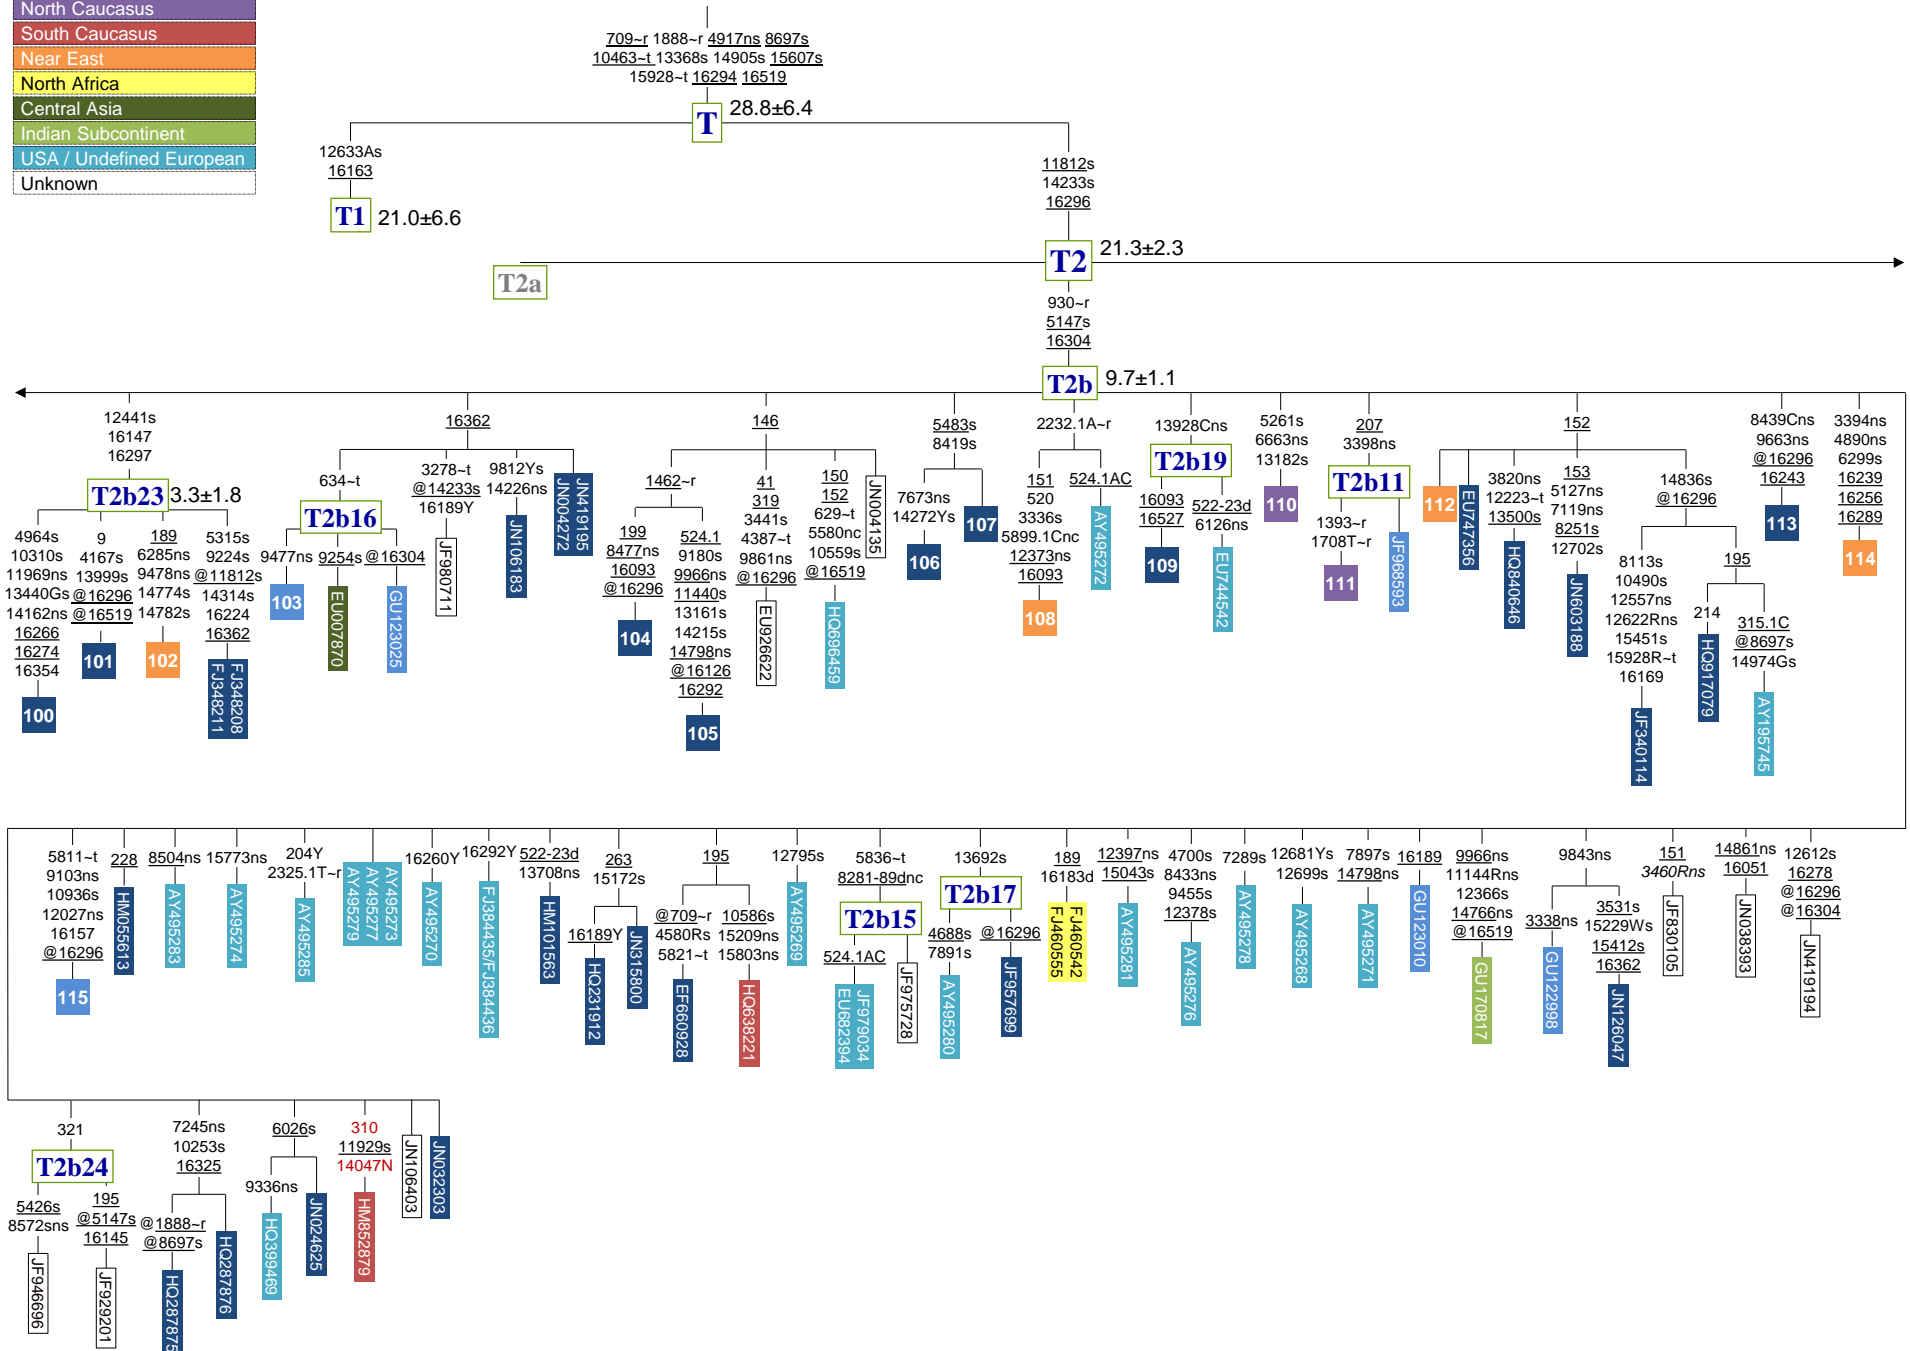

|                          |
|--------------------------|
| Western Europe           |
| Eastern Europe           |
| North Caucasus           |
| South Caucasus           |
| Near East                |
| North Africa             |
| Central Asia             |
| Indian Subcontinent      |
| USA / Undefined European |
| Unknown                  |

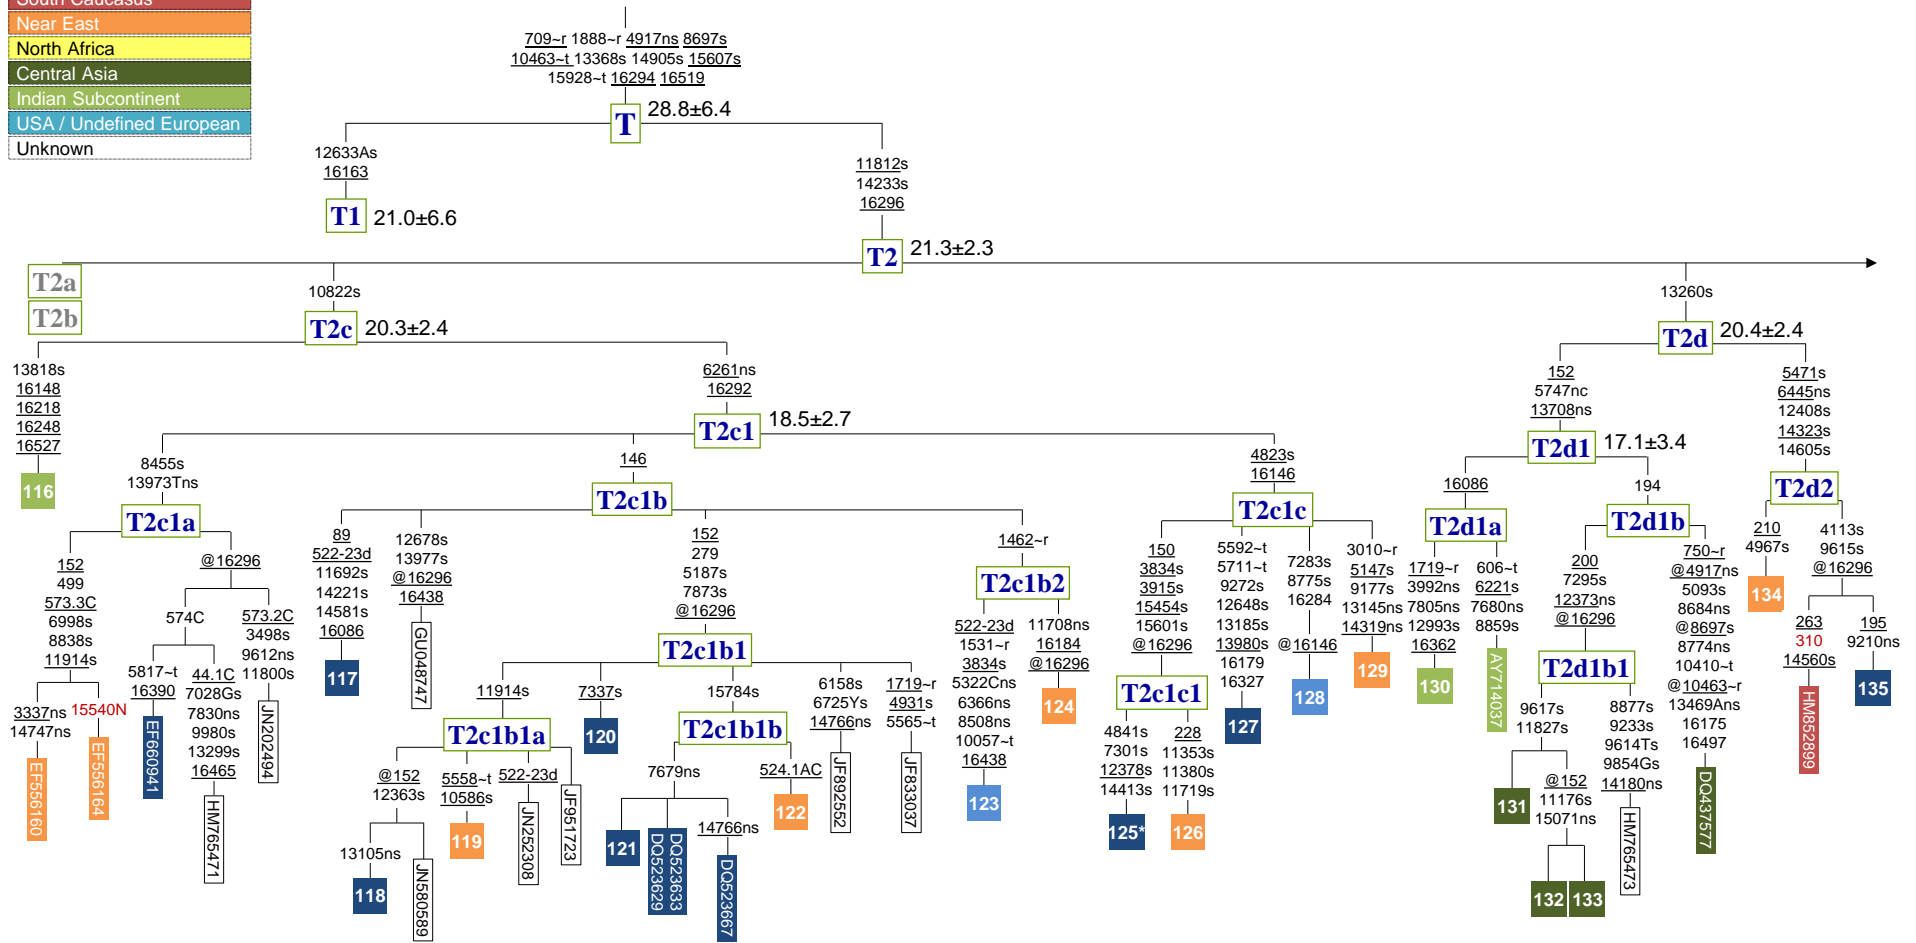



- Western Europe
- Eastern Europe
- North Caucasus
- South Caucasus
- Near East
- North Africa
- Central Asia
- Indian Subcontinent
- USA / Undefined European
- Unknown

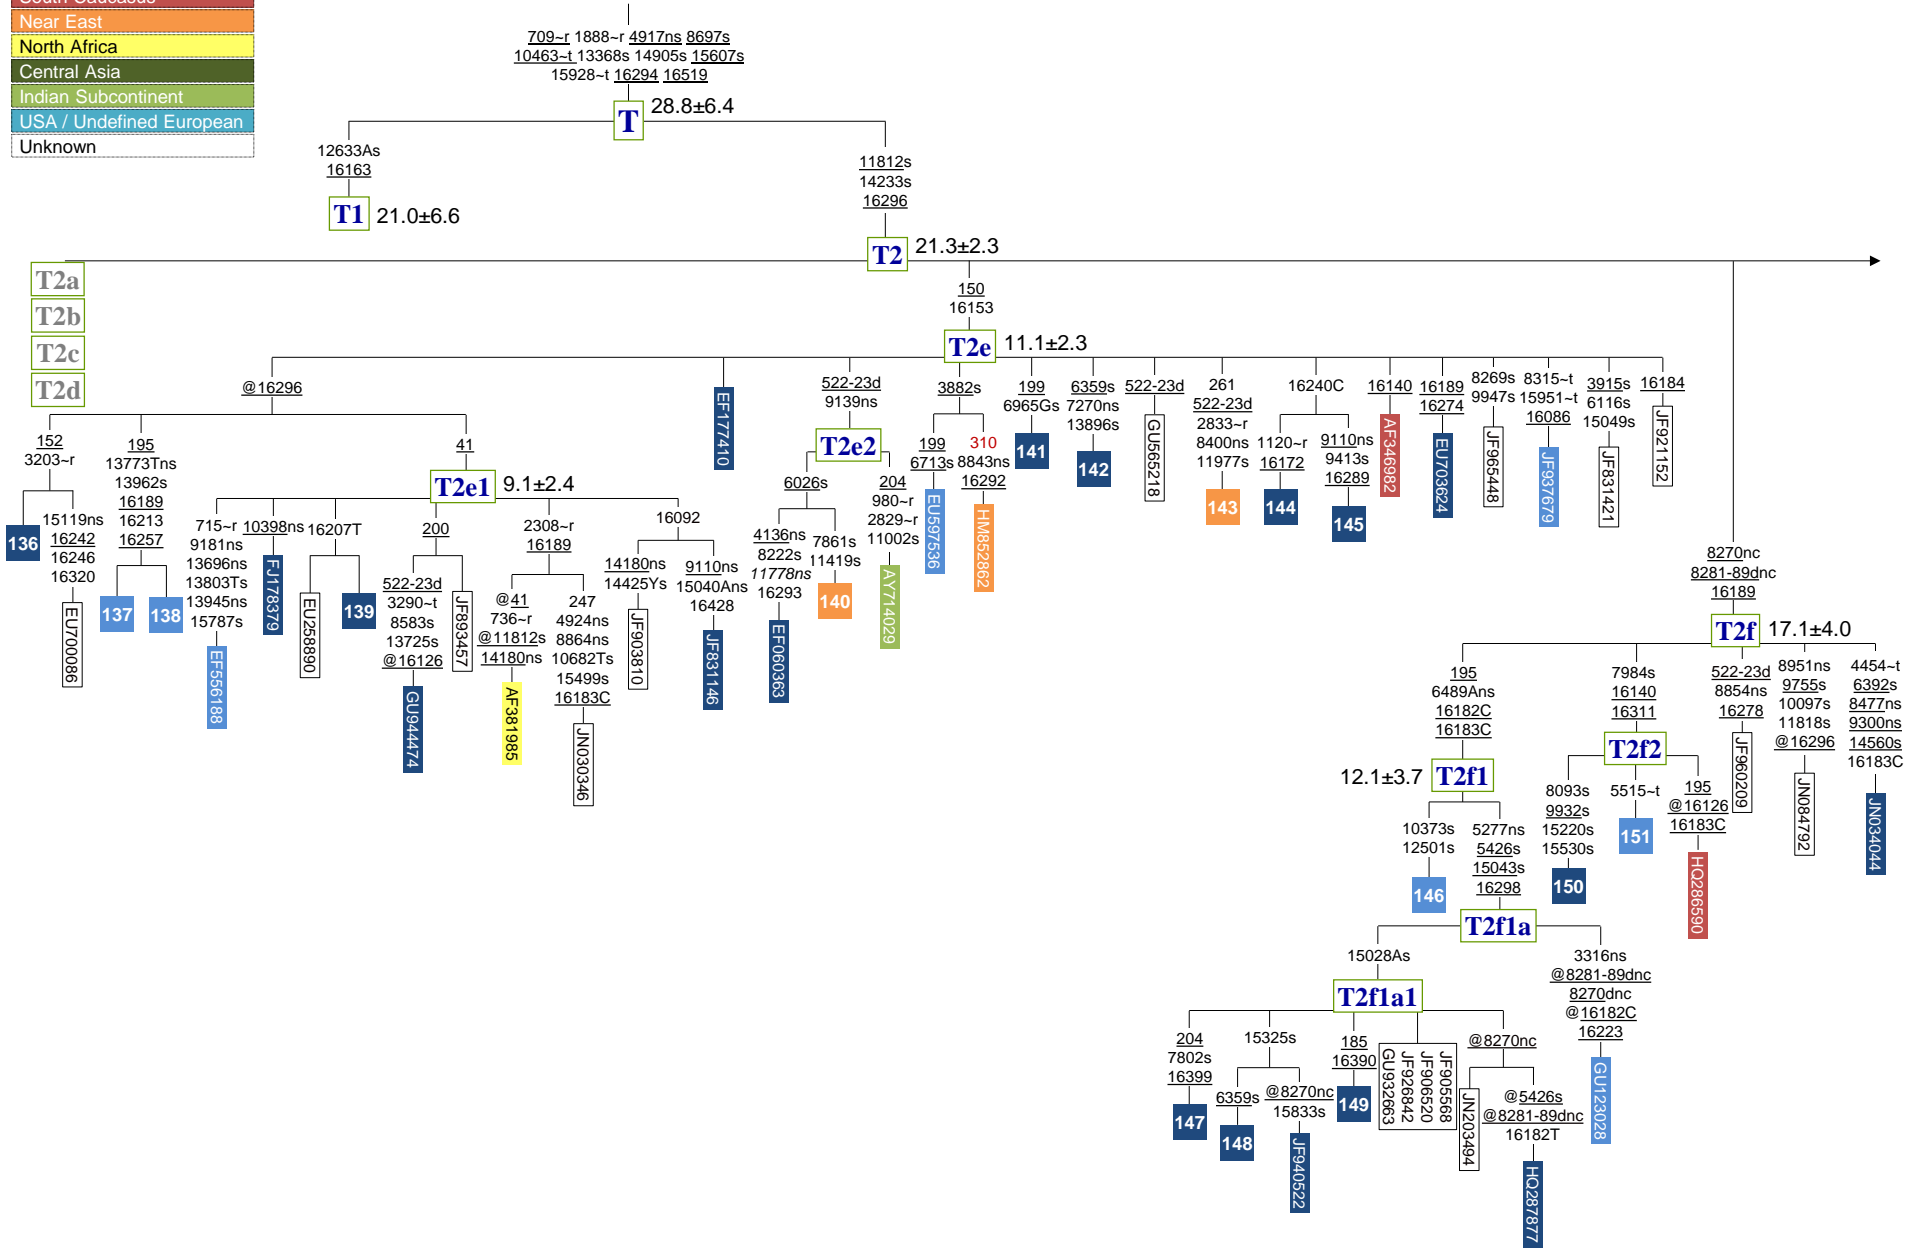



**Figure S2.** Maximum-Parsimony Phylogenetic Tree of 451 Complete mtDNA Sequences Belonging to Haplogroup T

Mutations are shown on the branches; they are transitions unless the base change is explicitly indicated. The prefix “@” designates reversions, whereas suffixes indicate: transversions (to A, G, C, or T), deletions “d”, gene locus (~t, tRNA; ~r, rRNA; ~nc, noncoding region outside of the control region), synonymous or non-synonymous changes (s or ns), and heteroplasmies (R, Y, W, K). Insertions are also suffixed with a dot followed by a number indicating how many bases were inserted and the inserted nucleotide/s (.1C). Recurrent mutations are underlined. Italics highlight pathological mutations while brown labels indicate potential phantom mutations or documentation errors that have not been considered for the age calculations. DNA of samples marked with an asterisk (\*) derived from cybrid cell lines. The variation in number of Cs at np 309 was not included in the phylogeny. Each rectangle represents a sample, they are numbered according to the order they appear on the tree, while previously published sequences are identified by their GenBank accession number. All the samples are coloured according to their geographic origin, as shown in the legend.

J1

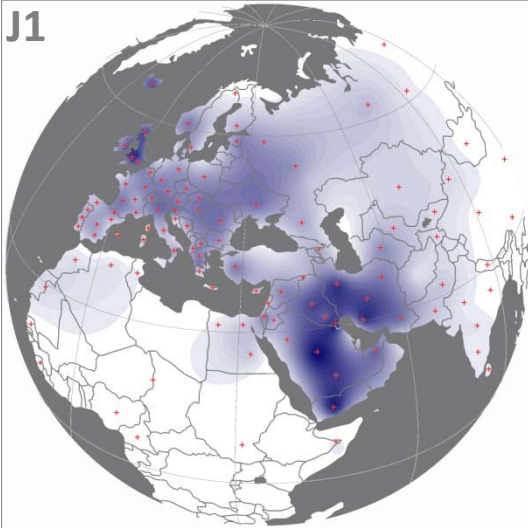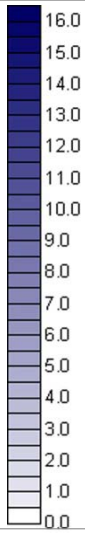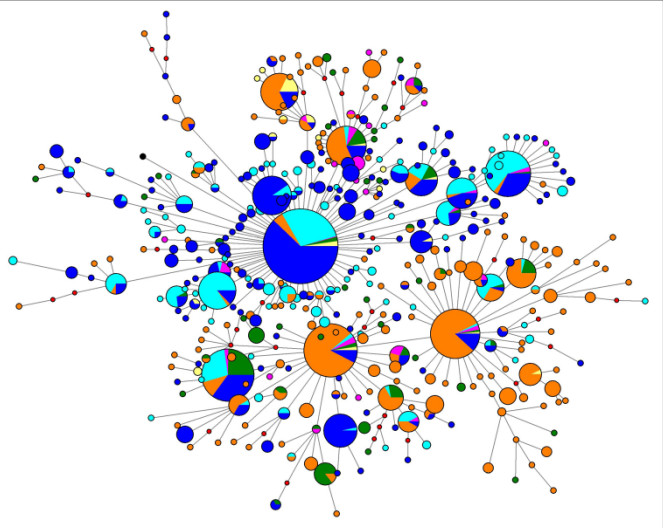

J1b

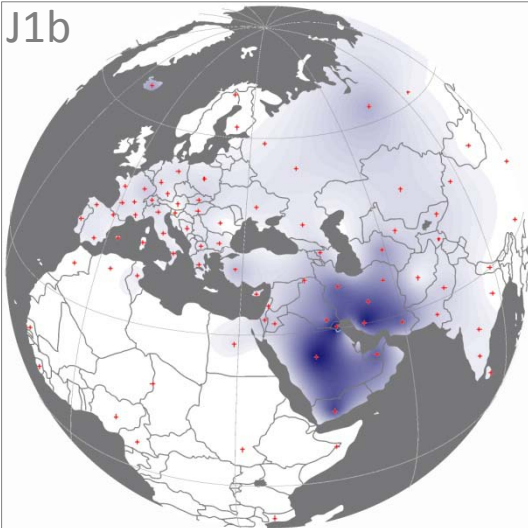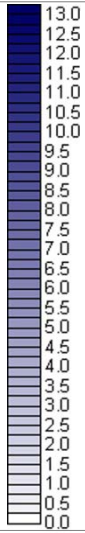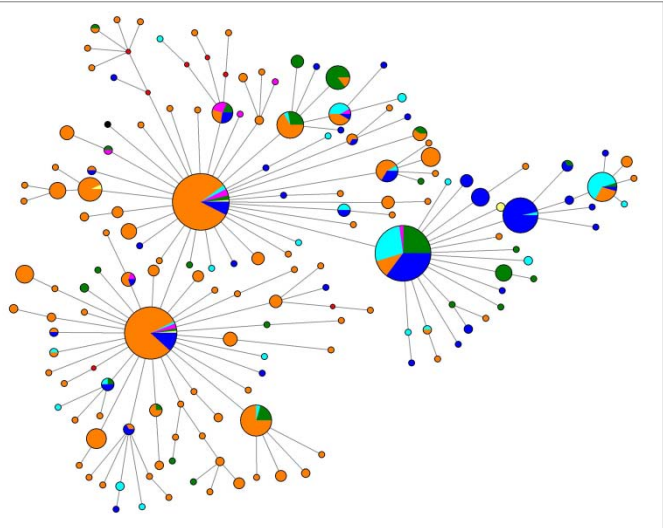

J1c

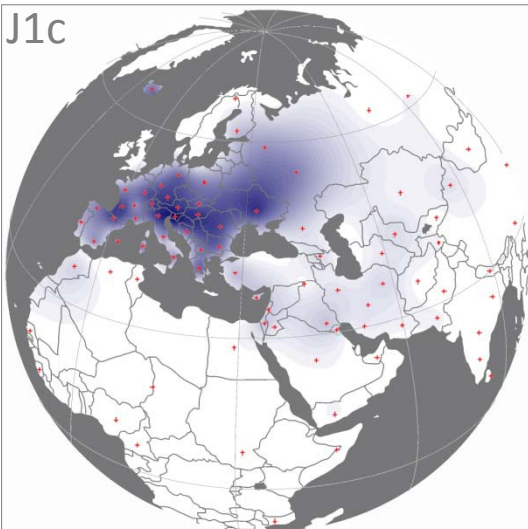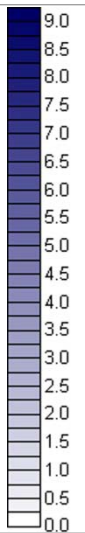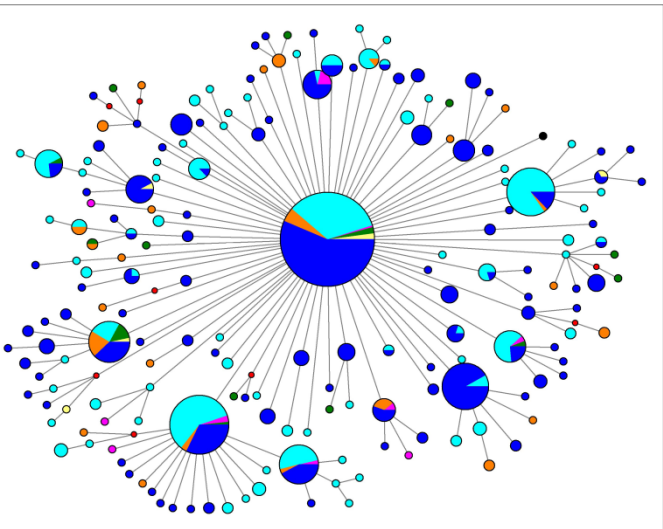

◆ rCRS; ◆ Africa; ◆ Asia; ◆ Caucasus; ◆ E. Europe; ◆ Near East; ◆ W. Europe.

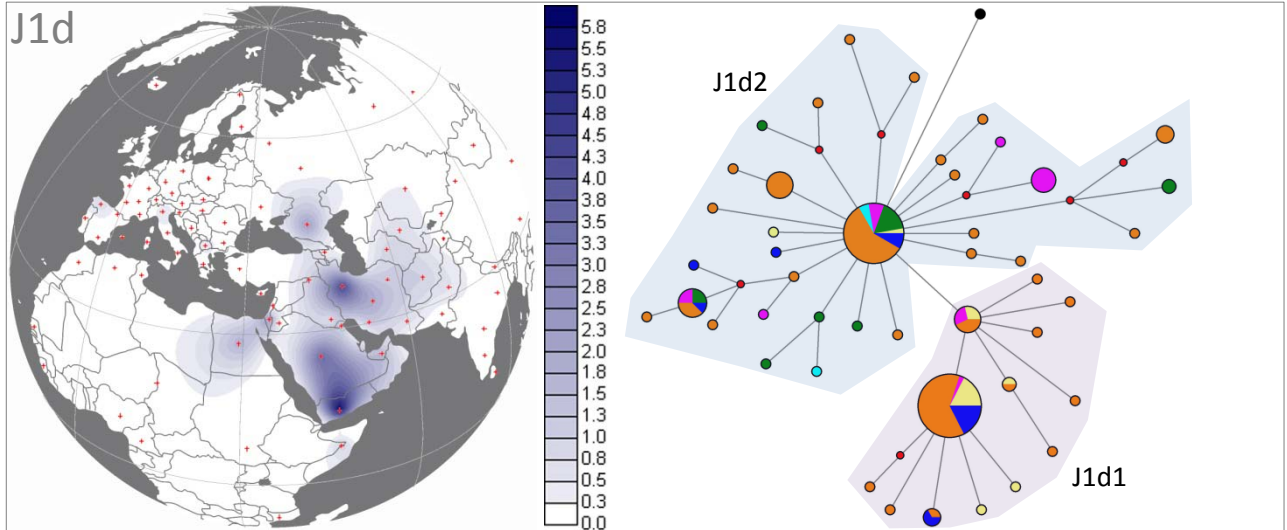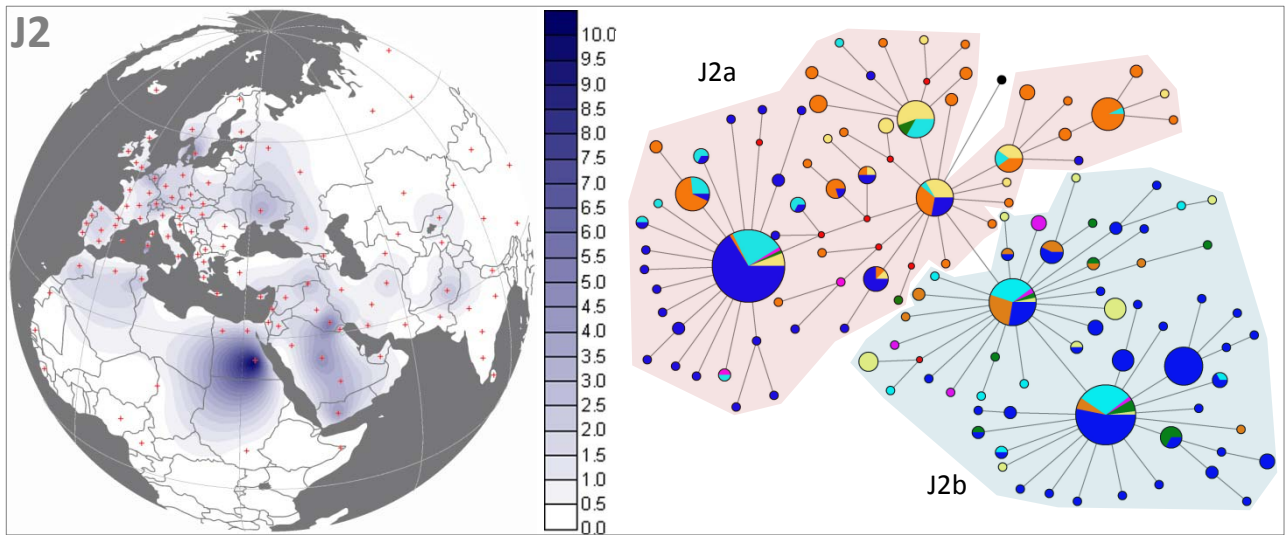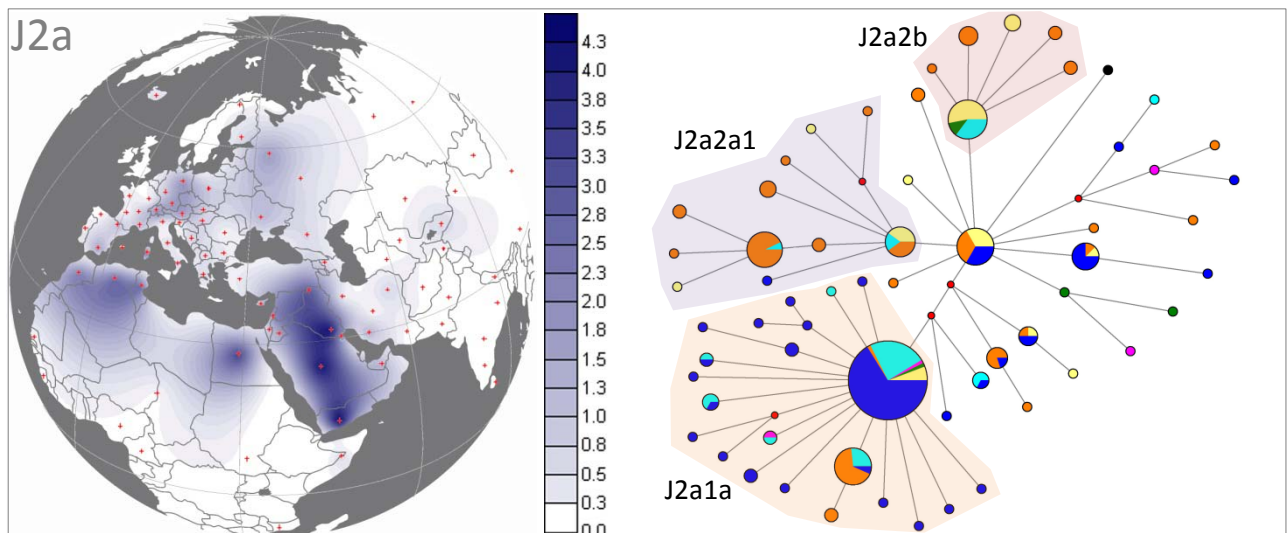

◆ rCRS; ◆ Africa; ◆ Asia; ◆ Caucasus; ◆ E. Europe; ◆ Near East; ◆ W. Europe.

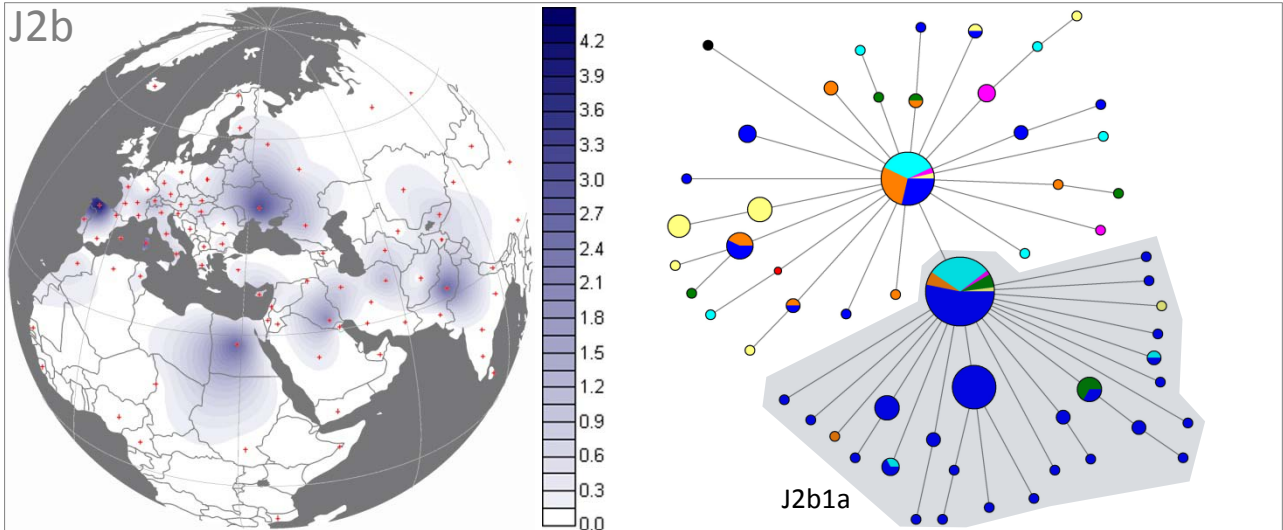

◆ rCRS; ◆ Africa; ◆ Asia; ◆ Caucasus; ◆ E. Europe; ◆ Near East; ◆ W. Europe.

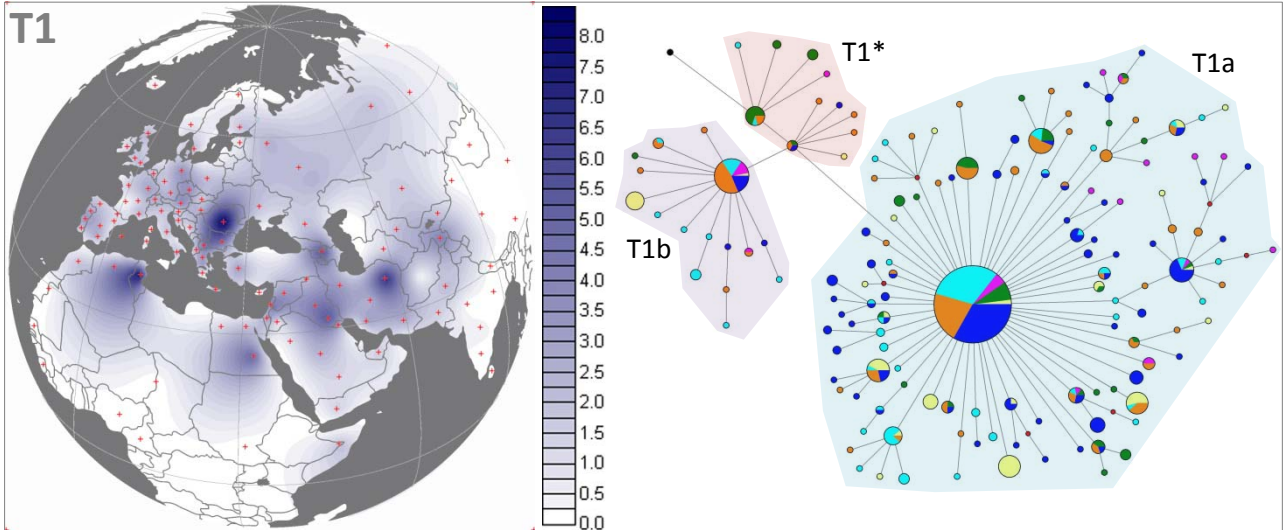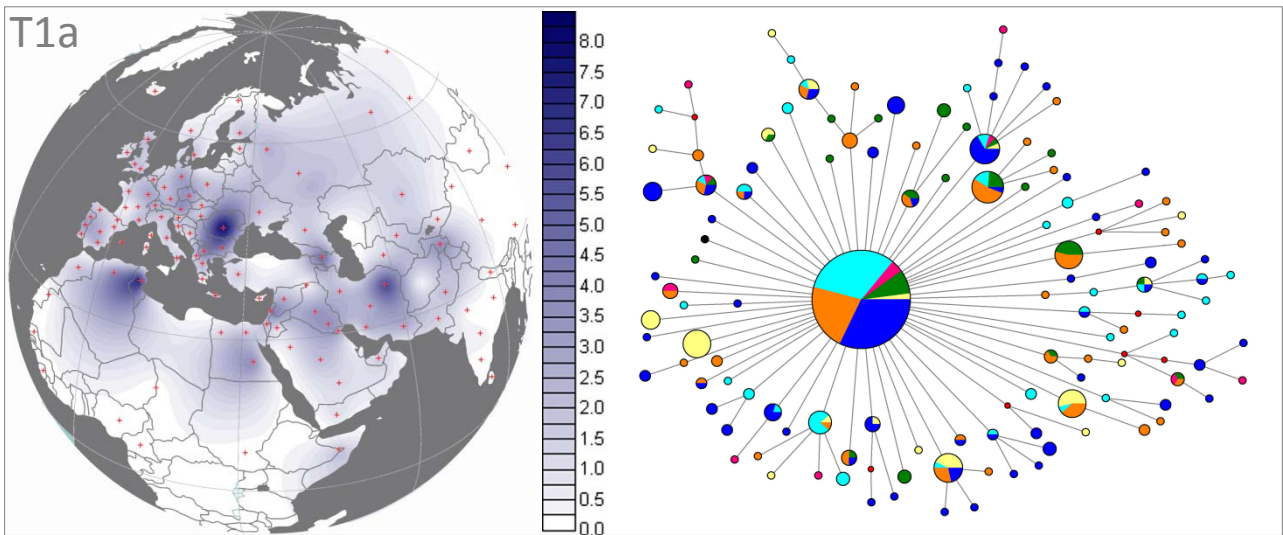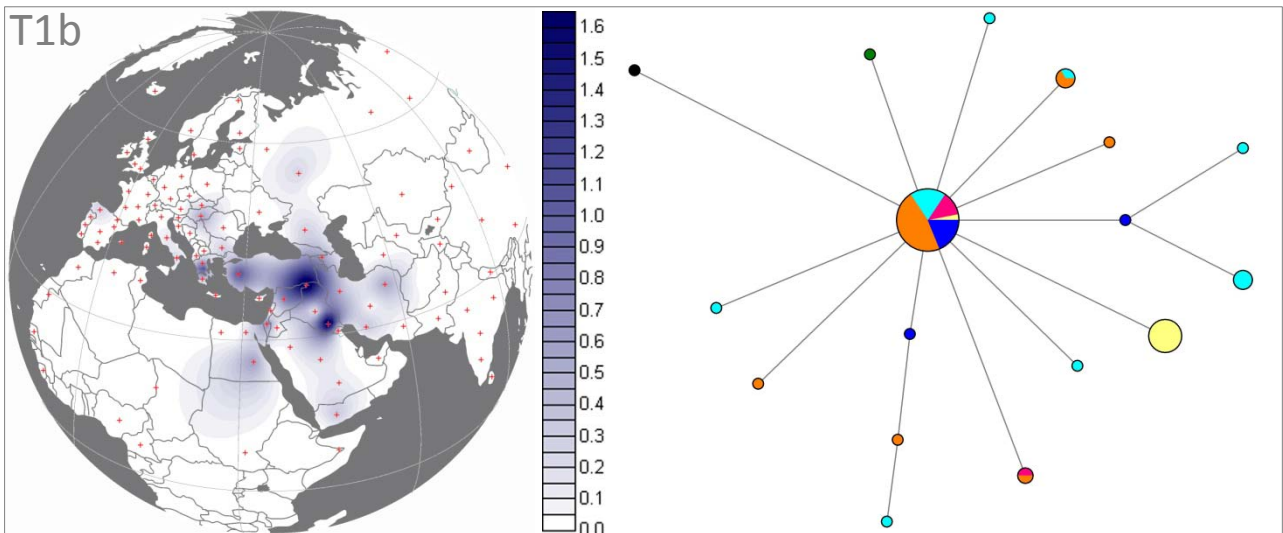

◆ rCRS; ◆ Africa; ◆ Asia; ◆ Caucasus; ◆ E. Europe; ◆ Near East; ◆ W. Europe.

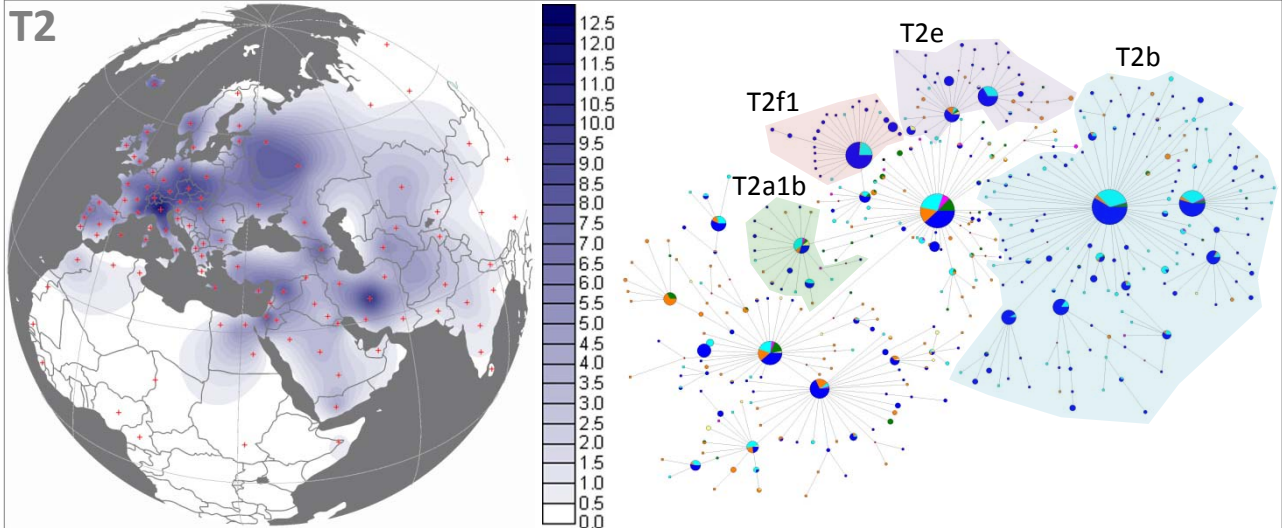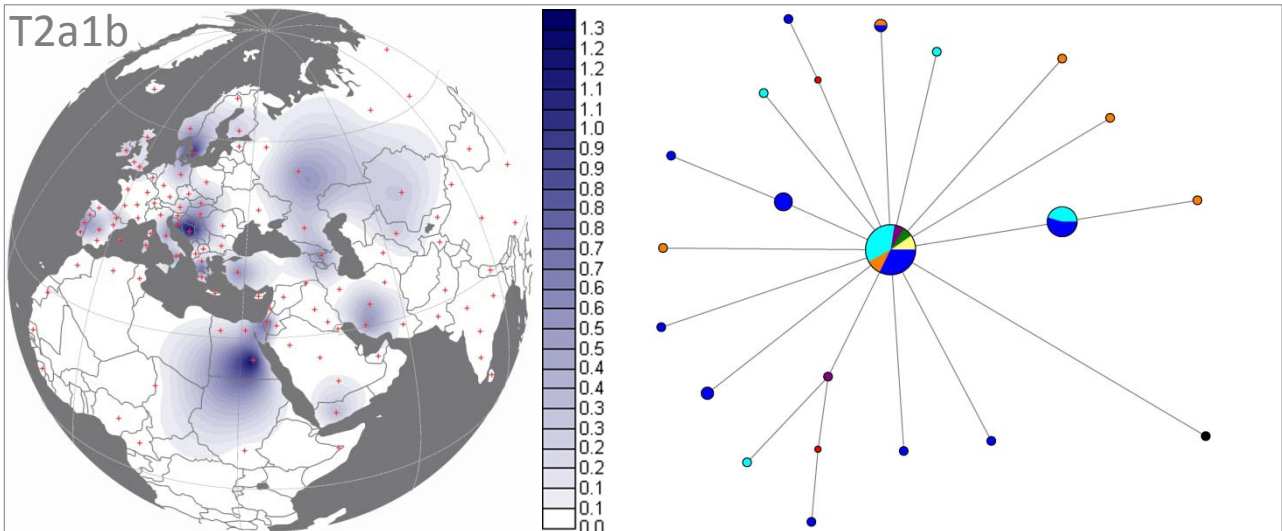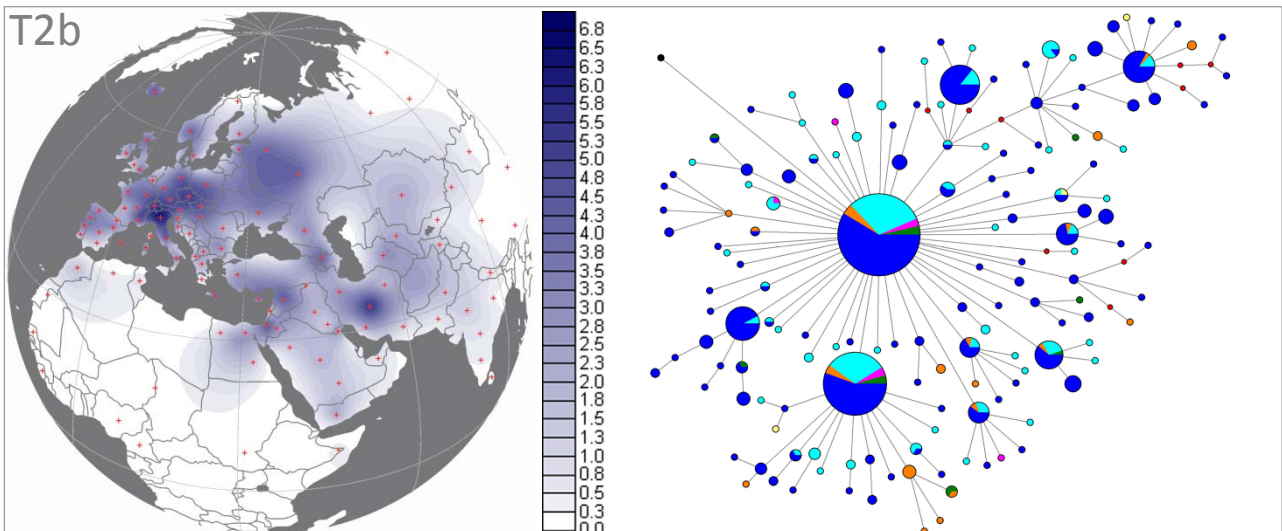

◆ rCRS; ◆ Africa; ◆ Asia; ◆ Caucasus; ◆ E. Europe; ◆ Near East; ◆ W. Europe.



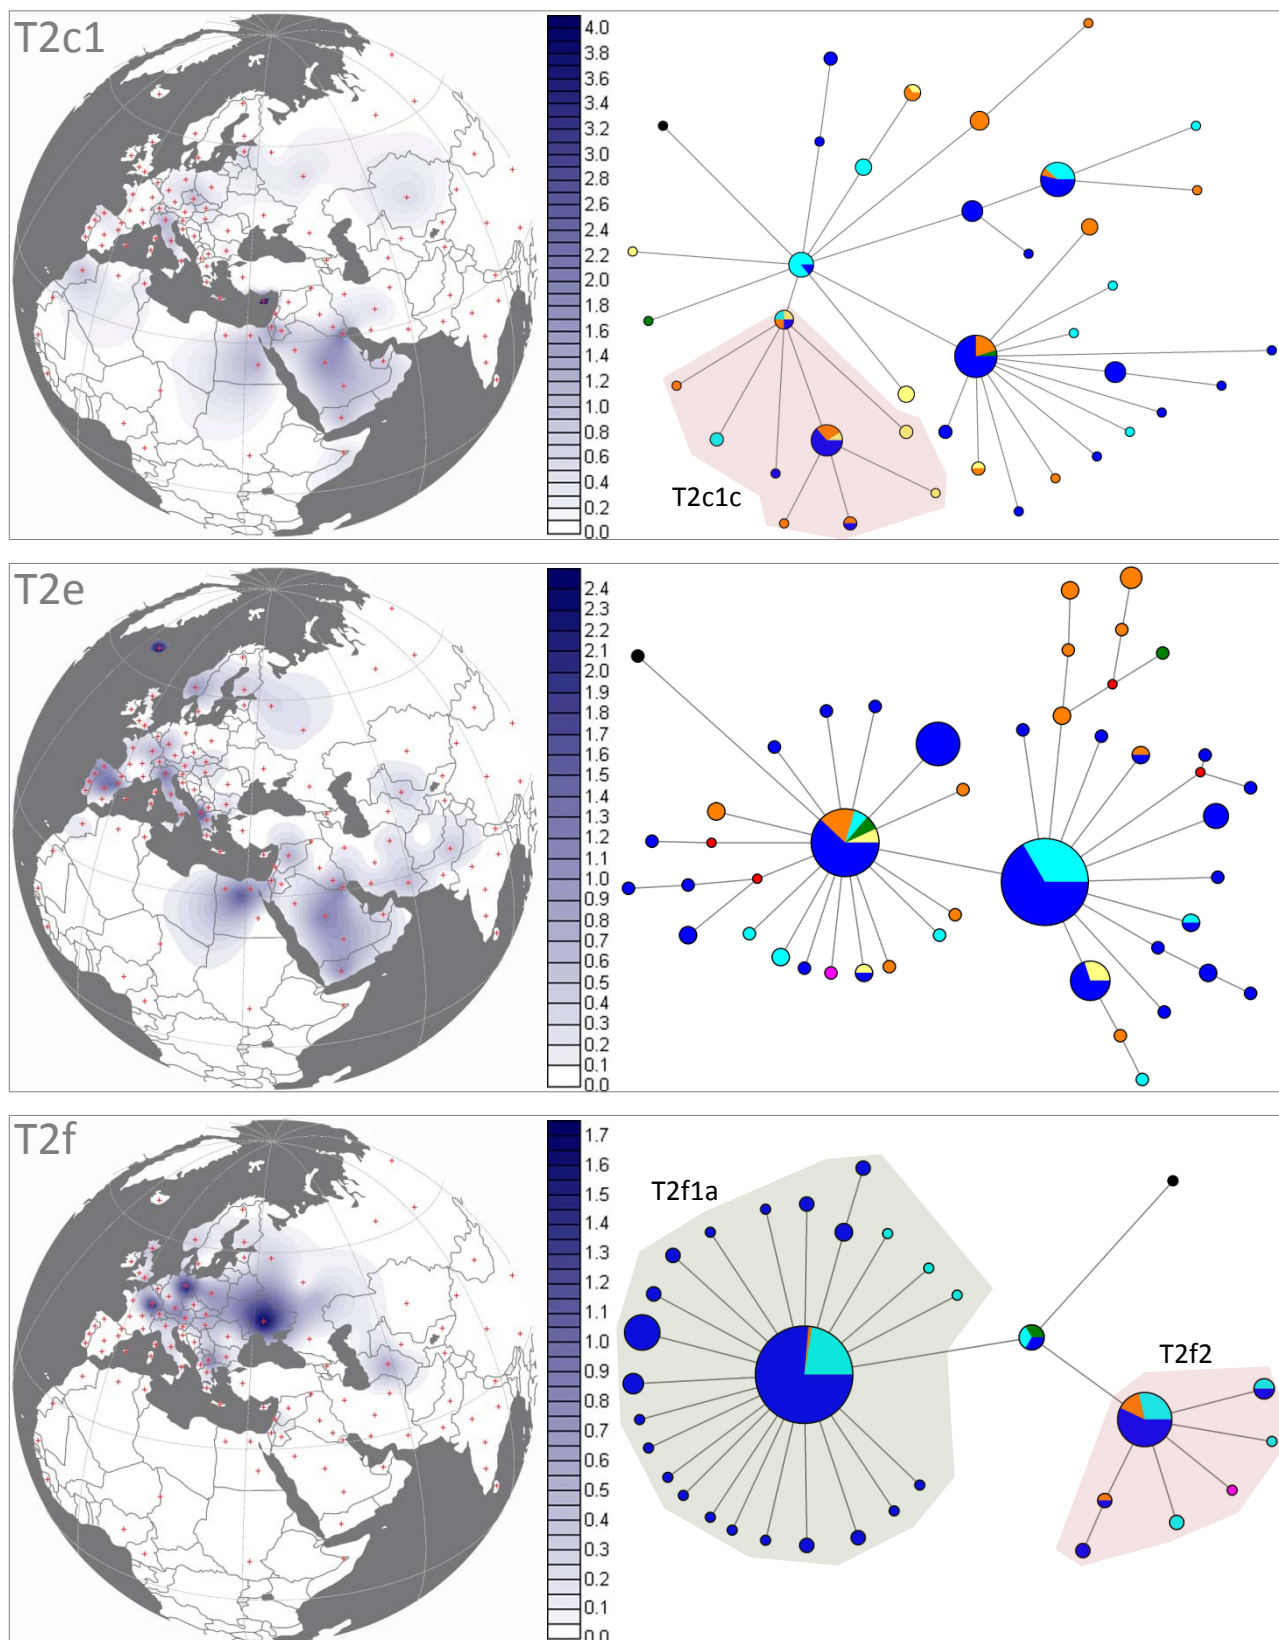

**Figure S3.** Frequency Distribution Maps and Corresponding HVS-I Networks Obtained for Haplogroups J (and Subclades) and T (and Subclades)

**Table S5. Diversity Values of JT Lineages Observed in Near East, Eastern, and Western Europe**

| Clade | Geographic Area | No. of MtDNAs | No. of Haplotypes <sup>a</sup> | $\rho^b$             | $\pi^c$              | $h^d$                |
|-------|-----------------|---------------|--------------------------------|----------------------|----------------------|----------------------|
| J     | Near East       | 615           | 193                            | <b>4.119</b> ± 1.199 | <b>0.970</b> ± 0.003 | <b>1.135</b> ± 0.024 |
|       | Eastern Europe  | 501           | 120                            | 1.633 ± 0.424        | 0.906 ± 0.010        | 0.756 ± 0.027        |
|       | Western Europe  | 973           | 222                            | 1.673 ± 0.314        | 0.889 ± 0.009        | 0.807 ± 0.022        |
|       | Total           | 2089          |                                |                      |                      |                      |
| J1    | Near East       | 523           | 163                            | <b>3.756</b> ± 1.274 | <b>0.963</b> ± 0.004 | <b>1.064</b> ± 0.028 |
|       | Eastern Europe  | 423           | 102                            | 1.530 ± 0.363        | 0.885 ± 0.013        | 0.701 ± 0.030        |
|       | Western Europe  | 753           | 162                            | 1.545 ± 0.339        | 0.849 ± 0.013        | 0.700 ± 0.025        |
|       | Total           | 1699          |                                |                      |                      |                      |
| J1b   | Near East       | 363           | 100                            | 1.540 ± 0.472        | <b>0.937</b> ± 0.008 | <b>0.727</b> ± 0.029 |
|       | Eastern Europe  | 67            | 26                             | <b>1.702</b> ± 0.691 | 0.863 ± 0.032        | 0.656 ± 0.064        |
|       | Western Europe  | 126           | 37                             | 1.651 ± 0.744        | 0.887 ± 0.018        | 0.588 ± 0.034        |
|       | Total           | 556           |                                |                      |                      |                      |
| J1c   | Near East       | 54            | 25                             | <b>1.241</b> ± 0.263 | <b>0.898</b> ± 0.033 | <b>0.680</b> ± 0.075 |
|       | Eastern Europe  | 324           | 73                             | 0.988 ± 0.259        | 0.856 ± 0.016        | 0.507 ± 0.026        |
|       | Western Europe  | 461           | 98                             | 0.833 ± 0.156        | 0.829 ± 0.017        | 0.460 ± 0.021        |
|       | Total           | 839           |                                |                      |                      |                      |
| J1d   | Near East       | 86            | 30                             | 1.616 ± 0.576        | <b>0.852</b> ± 0.027 | <b>0.683</b> ± 0.063 |
|       | Eastern Europe  | 3             | 2                              | 0.667 ± 0.471        | 0.667 ± 0.314        | 0.381 ± 0.180        |
|       | Western Europe  | 15            | 6                              | <b>1.800</b> ± 0.887 | 0.762 ± 0.096        | 0.550 ± 0.116        |
|       | Total           | 104           |                                |                      |                      |                      |
| J2    | Near East       | 91            | 36                             | 2.297 ± 0.554        | <b>0.951</b> ± 0.010 | <b>1.091</b> ± 0.051 |
|       | Eastern Europe  | 69            | 21                             | 2.348 ± 0.845        | 0.881 ± 0.022        | 0.935 ± 0.045        |
|       | Western Europe  | 186           | 63                             | <b>2.747</b> ± 0.942 | 0.910 ± 0.014        | 1.029 ± 0.028        |
|       | Total           | 346           |                                |                      |                      |                      |
| J2a   | Near East       | 67            | 25                             | 2.552 ± 0.722        | <b>0.928</b> ± 0.017 | <b>1.139</b> ± 0.056 |
|       | Eastern Europe  | 37            | 11                             | 2.811 ± 1.260        | 0.784 ± 0.059        | 0.707 ± 0.096        |
|       | Western Europe  | 85            | 29                             | <b>2.906</b> ± 1.378 | 0.715 ± 0.055        | 0.564 ± 0.065        |
|       | Total           | 189           |                                |                      |                      |                      |
| J2b   | Near East       | 21            | 9                              | 0.667 ± 0.278        | 0.833 ± 0.066        | 0.354 ± 0.056        |
|       | Eastern Europe  | 31            | 9                              | 0.871 ± 0.527        | 0.708 ± 0.061        | 0.350 ± 0.072        |
|       | Western Europe  | 100           | 35                             | <b>1.610</b> ± 0.814 | <b>0.893</b> ± 0.020 | <b>0.535</b> ± 0.038 |
|       | Total           | 152           |                                |                      |                      |                      |
| T     | Near East       | 385           | 166                            | <b>3.725</b> ± 0.944 | <b>1.208</b> ± 0.025 | 0.963 ± 0.006        |
|       | Eastern Europe  | 550           | 156                            | 2.967 ± 0.939        | 1.043 ± 0.021        | 0.940 ± 0.006        |
|       | Western Europe  | 1127          | 274                            | 2.800 ± 0.616        | 1.071 ± 0.016        | <b>0.965</b> ± 0.002 |
|       | Total           | 2062          |                                |                      |                      |                      |
| T1    | Near East       | 158           | 46                             | <b>2.608</b> ± 1.303 | <b>0.506</b> ± 0.036 | <b>0.822</b> ± 0.029 |
|       | Eastern Europe  | 158           | 43                             | 2.525 ± 1.338        | 0.409 ± 0.045        | 0.651 ± 0.045        |
|       | Western Europe  | 193           | 57                             | 1.782 ± 0.954        | 0.470 ± 0.040        | 0.758 ± 0.034        |
|       | Total           | 509           |                                |                      |                      |                      |
| T1a   | Near East       | 131           | 35                             | 0.733 ± 0.172        | 0.377 ± 0.036        | <b>0.753</b> ± 0.040 |
|       | Eastern Europe  | 140           | 32                             | 0.586 ± 0.148        | 0.260 ± 0.034        | 0.557 ± 0.052        |
|       | Western Europe  | 183           | 52                             | <b>0.874</b> ± 0.156 | <b>0.433</b> ± 0.040 | 0.732 ± 0.037        |
|       | Total           | 454           |                                |                      |                      |                      |
| T1b   | Near East       | 21            | 6                              | 0.333 ± 0.143        | 0.188 ± 0.063        | 0.495 ± 0.130        |
|       | Eastern Europe  | 16            | 9                              | <b>1.313</b> ± 0.455 | <b>0.586</b> ± 0.116 | <b>0.850</b> ± 0.077 |
|       | Western Europe  | 8             | 3                              | 0.250 ± 0.177        | 0.143 ± 0.068        | 0.464 ± 0.200        |
|       | Total           | 45            |                                |                      |                      |                      |
| T2    | Near East       | 227           | 120                            | 2.586 ± 0.551        | <b>1.009</b> ± 0.036 | <b>0.979</b> ± 0.004 |
|       | Eastern Europe  | 392           | 113                            | 2.227 ± 0.616        | 0.775 ± 0.025        | 0.939 ± 0.007        |
|       | Western Europe  | 934           | 217                            | <b>2.664</b> ± 0.640 | 0.902 ± 0.016        | 0.960 ± 0.003        |
|       | Total           | 1553          |                                |                      |                      |                      |
| T2a1b | Near East       | 8             | 6                              | 0.750 ± 0.306        | 0.429 ± 0.106        | <b>0.893</b> ± 0.111 |
|       | Eastern Europe  | 19            | 5                              | 0.474 ± 0.283        | 0.237 ± 0.061        | 0.620 ± 0.099        |
|       | Western Europe  | 28            | 11                             | <b>0.893</b> ± 0.337 | <b>0.462</b> ± 0.072 | 0.847 ± 0.047        |
|       | Total           | 55            |                                |                      |                      |                      |
| T2b   | Near East       | 36            | 19                             | <b>1.333</b> ± 0.375 | <b>0.651</b> ± 0.073 | <b>0.919</b> ± 0.032 |
|       | Eastern Europe  | 187           | 53                             | 0.904 ± 0.246        | 0.466 ± 0.034        | 0.807 ± 0.027        |
|       | Western Europe  | 421           | 97                             | 1.097 ± 0.274        | 0.541 ± 0.022        | 0.870 ± 0.014        |
|       | Total           | 644           |                                |                      |                      |                      |
| T2c1  | Near East       | 25            | 14                             | <b>1.800</b> ± 0.584 | <b>0.747</b> ± 0.084 | <b>0.937</b> ± 0.026 |
|       | Eastern Europe  | 21            | 9                              | 1.286 ± 0.493        | 0.626 ± 0.079        | 0.862 ± 0.048        |
|       | Western Europe  | 54            | 18                             | 1.630 ± 0.635        | 0.614 ± 0.051        | 0.882 ± 0.028        |
|       | Total           | 100           |                                |                      |                      |                      |
| T2e   | Near East       | 20            | 11                             | <b>2.050</b> ± 0.779 | <b>0.868</b> ± 0.096 | <b>0.916</b> ± 0.041 |
|       | Eastern Europe  | 23            | 6                              | 1.000 ± 0.749        | 0.262 ± 0.075        | 0.518 ± 0.122        |

|     |                |     |    |                      |                      |                      |
|-----|----------------|-----|----|----------------------|----------------------|----------------------|
|     | Western Europe | 94  | 24 | 1.181 ± 0.601        | 0.457 ± 0.039        | 0.830 ± 0.027        |
|     | Total          | 137 |    |                      |                      |                      |
| T2f | Near East      | 6   | 3  | <b>2.000</b> ± 1.202 | 0.354 ± 0.171        | 0.600 ± 0.215        |
|     | Eastern Europe | 38  | 9  | 1.526 ± 0.781        | <b>0.498</b> ± 0.057 | 0.686 ± 0.070        |
|     | Western Europe | 130 | 25 | 1.554 ± 0.870        | 0.424 ± 0.041        | <b>0.712</b> ± 0.041 |
|     | Total          | 274 |    |                      |                      |                      |

<sup>a</sup> HVS-I haplotypes (from np 16051 to np 16400)  
<sup>b</sup> average divergence from the root  
<sup>c</sup> mean pairwise divergence (%)  
<sup>d</sup> gene diversity  
Peak values are in bold.

## Supplemental References

1. Palanichamy, M.g., Sun, C., Agrawa, S., Bandelt, H.-J., Kong, Q.-P., Khan, F., Wang, C.-Y., Chaudhuri, T.P., Palla, V., Zhang, Y.-P. (2004). Phylogeny of mtDNA macrohaplogroup N in India based on complete sequencing: implications for the peopling of South Asia. *Am. J. Hum. Genet.* 75:966-978.
2. Coble, M.D., Just, R.S., O'Callaghan, J.E., Letmanyi, I.H., Peterson, C.T., Irwin, J.A., Parsons, T.J. (2004). Single nucleotide polymorphisms over the entire mtDNA genome that increase the power of forensic testing in Caucasians. *Int. J. Legal Med.* 118:137-146.
3. Greenspan, B. (2008). FTDNA Direct submission. GenBank.
4. Greenspan, B. (2010). FTDNA Direct submission. GenBank.
5. This study
6. Pello, R., Martin, M.A., Carelli, V., Nijtmans, L.G., Achilli, A., Pala, M., Torroni, A., Gomez-Duran, A., Ruiz-Pesini, E., Martinuzzi, A., et al. (2008). Mitochondrial DNA background modulates the assembly kinetics of OXPHOS complexes in a cellular model of mitochondrial disease. *Hum. Mol. Genet.* 17: 4001-4011.
7. Gomez-Duran, A.J. (2011). Direct submission. GenBank
8. Schoenberg, A., Theunert, C., Li, M., Stoneking, M., Nasidze, I. (2011). High-throughput sequencing of complete human mtDNA genomes from the Caucasus and West Asia, high diversity and demographic inferences. *Eur. J. Hum. Genet.* 19:988-994.
9. Gasparre, G., Porcelli, A.M., Bonora, E., Pennisi, L.F., Toller, M., Iommarini, L., Ghelli, A., Moretti, M., Betts, C.M., Martinelli, G.N., et al. (2007). Disruptive mitochondrial DNA mutations in complex I subunits are markers of oncocytic phenotype in thyroid tumors. *Proc. Natl. Acad. Sci. USA* 104:9001-9006.
10. Greenspan, B. (2011). FTDNA Direct submission. GenBank.
11. Derenko, M., Malyarchuk, B., Grzybowski, T., Denisova, G., Dambueva, I., Perkova, M., Dorzhu, C., Luzina, F., Lee, H.K., Vanecek, T., et al. (2007). Phylogeographic analysis of mitochondrial DNA in northern Asian populations. *Am. J. Hum. Genet.* 81:1025-1041.
12. Greenspan, B. (2009). FTDNA Direct submission. GenBank
13. Behar, D.M., Metspalu, E., Kivisild, T., Rosset, S., Tzur, S., Haddid, Y., Yudkovsky, G., Rosengarten, D., Pereira, L., Amorim, A., et al. (2008). Counting the founders: The matrilineal genetic ancestry of the Jewish Diaspora. *PLoS One* 3:e2062.
14. Just, R.S., Diegolo, T.M., Saunier, J.L., Irwin, J.A., Parsons, T.J. (2008). Complete mitochondrial genome sequences for 265 African American and U.S. "Hispanic" individuals. *Forensic Sci. Int. Genet.* *in press*
15. Maca-Meyer, N., González, A.M., Larruga, J.M., Flores, C., Cabrera, V.M. (2001). Major genomic mitochondrial lineages delineate early human expansions. *BMC Genetics* 2001 2:13.
16. Malyarchuk, B.A., Perkova, M.A., Derenko, M.V., Vanecek, T., Lazur, J., Gomolcak, P. (2008). Mitochondrial DNA variability in Slovaks, with application to the Roma origin. *Ann. Hum. Genet.* 72:228-240.

17. Pichler, I., Fuchsberger, C., Platzer, C., Caliskan, M., Marroni, F., Pramstaller, P.P., Ober, C. (2010). Drawing the history of the Hutterite population on a genetic landscape, inference from Y-chromosome and mtDNA genotypes. *Eur. J. Hum. Genet.* *18*:463-470.
18. Gomez-Carballa, A., Cerezo, M., Balboa, E., Heredia, C., Castro-Feijoo, L., Rica, I., Barreiro, J., Eiris, J., Cabanas, P., Martinez-Soto, I., et al. (2011). Evolutionary analyses of entire genomes do not support the association of mtDNA mutations with Ras/MAPK pathway syndromes. *PLoS ONE* *6*:E18348.
19. Pereira, L., Goncalves, J., Franco-Duarte, R., Silva, J., Rocha, T., Arnold, C., Richards, M., Macaulay, V. (2007). No evidence for an mtDNA role in sperm motility: data from complete sequencing of asthenozoospermic males. *Mol. Biol. Evol.* *24*:868-874.
20. Greenspan, B. (2007). FTDNA Direct submission. GenBank.
21. Kloss-Brandstatter, A., Schafer, G., Erhart, G., Huttenhofer, A., Coassin, S., Seifarth, C., Summerer, M., Bektic, J., Klocker, H., Kronenberg, F. (2010). Somatic mutations throughout the entire mitochondrial genome are associated with elevated PSA levels in prostate cancer patients. *Am. J. Hum. Genet.* *87*:802-812.
22. Mishmar, D., Ruiz-Pesini, E., Golik, P., Macaulay, V., Clark, A.G., Hosseini, S., Brandon, M., Easley, K., Chen, E., Brown, M.D., et al. (2003). Natural selection shaped regional mtDNA variation in humans. *Proc. Natl. Acad. Sci. U. S. A.* *100*:171-176.
23. Greenspan, B. (2006). FTDNA Direct submission. GenBank.
24. Ghelli, A., Porcelli, A.M., Zanna, C., Vidoni, S., Mattioli, S., Barbieri, A., Iommarini, L., Pala, M., Achilli, A., Torroni, A., et al. (2009). The background of mitochondrial DNA haplogroup J increases the sensitivity of Leber's hereditary optic neuropathy cells to 2,5-hexanedione toxicity. *PLoS ONE* *4*:E7922.
25. Fendt, L., Niederstatter, H., Huber, G., Zelger, B., Dunser, M., Seifarth, C., Rock, A., Schafer, G., Klocker, H., Parson, W. (2011). Accumulation of mutations over the entire mitochondrial genome of breast cancer cells obtained by tissue microdissection. *Breast Cancer Research and Treatment* *128*:327-336.
26. Detjen, K.A., Tinschert, S., Kaufmann, D., Algermissen, B., Nurnberg, P., Schuelke, M. (2006). Direct submission. GenBank.
27. Malyarchuk, B., Derenko, M., Denisova, G., Kravtsova, O. (2010). Mitogenomic diversity in Tatars from the Volga-Ural region of Russia. *Mol. Biol. Evol.* *27*:2220-2226.
28. Hartmann, A., Thieme, M., Nanduri, L.K., Stempfl, T., Moehle, C., Kivisild, T., Oefner, P.J. (2009). Validation of microarray-based resequencing of 93 worldwide mitochondrial genomes. *Hum. Mutat.* *30*:115-122.
29. Fraumene, C., Belle, E.M., Castri, L., Sanna, S., Mancosu, G., Cosso, M., Marras, F., Barbujani, G., Pirastu, M., Angius, A. (2006). High resolution analysis and phylogenetic network construction using complete mtdna sequences in Sardinian genetic isolates. *Mol. Biol. Evol.* *23*:2101-2111.
30. Zsurka, G., Schroder, R., Kornblum, C., Rudolph, J., R.J., W., Elger, C.E., Kunz, W.S. (2004). Tissue dependent co-segregation of the novel pathogenic G12276A mitochondrial tRNA<sup>Leu</sup>(CUN). mutation with the A185G D-loop polymorphism. *Journal of Medical Genetics* *41*:e124.
31. Carelli, V., Achilli, A., Valentino, M.L.R., C., Semino, O., Pala, M., Olivieri, A., Mattiazzi, M., Pallotti, F., Carrara, F., Zeviani, M., et al. (2006). Haplogroup effects and recombination of mitochondrial DNA, novel clues from the analysis of Leber hereditary optic neuropathy pedigrees. *Am. J. Hum. Genet.* *78*:564-574.
32. Ingman, M., Gyllensten, U. (2007). Rate variation between mitochondrial domains and adaptive evolution in humans. *Hum. Mol. Genet.* *16*:2281-2287.
33. Pope, A.M., Carr, S.M., Smith, K.N., Marshall, H.D. (2011). Mitogenomic and microsatellite variation in descendants of the founder population of Newfoundland, high genetic diversity in an historically isolated population. *Genome* *54*:110-119.
34. Amati-Bonneau, P., Valentino, M.L., Reynier, P., Gallardo, M.E., Bornstein, B., Boissiere, A., Campos, Y., Rivera, H., la, G.d., Aleja, J., et al. (2007). Direct submission. GenBank.
35. Zaragoza, M.V., Fass, J., Diegoli, M., Lin, D., Arbustini, E. (2010). Mitochondrial DNA variant discovery and evaluation in human cardiomyopathies through next-generation sequencing. *PLoS ONE* *5*:E12295.

36. Gonder, M.K., Mortensen, H.M., Reed, F.A., de Sousa, A., Tishkoff, S.A. (2007). Whole-mtDNA genome sequence analysis of ancient African lineages. *Mol. Biol. Evol.* 24:757-768.
37. Desquirit, V., Procaccio, V., Chevrollier, A., Verny, C., Reynier, P., Bonneau, D., Amati Bonneau, P. (2009). Direct submission. GenBank.
38. Costa, M.D., Cherni, L., Fernandes, V., Freitas, F., el Gaaied, A.B.A., Pereira, L. (2009). Data from complete mtDNA sequencing of Tunisian centenarians: Testing haplogroup association and the "golden mean" to longevity. *Mechanisms of Ageing and Development* 130:222-226.
39. Brown, M.D., Allen, J.C., Van Stavern, G.P., Newman, N.J., Wallace, D.C. (2001). Clinical, genetic, and biochemical characterization of a Leber hereditary optic neuropathy family containing both the 11778 and 14484 primary mutations. *Am. J. Med. Genet.* 104:331-338.
40. Pike, D.A., Barton, T.J., Bauer, S.L., Kipp, E. (2010). MtDNA haplogroup T phylogeny based on full mitochondrial sequences. *J. Genet. Geneal.* 6:1-24.
41. Kujanova, M., Pereira, L., Fernandes, V., Pereira, J.B., Cerny, V. (2009). Near Eastern Neolithic genetic input in a small oasis of the Egyptian Western Desert. *Am. J. Phys. Anthropol.* 140:336-346.
42. Rogaev, E.I., Grigorenko, A.P., Moliaka, Y.K., Faskhutdinova, G., Goltsov, A., Lahti, A., Hildebrandt, C., Kittler, E.L., Morozova, I. (2009). Genomic identification in the historical case of the Nicholas II royal family. *Proc. Natl. Acad. Sci. USA* 106:5258-5263.
43. Olaisen, K.N., Greenspan, B. (2011). FTDNA Direct Submission. GenBank.
44. Fendt, L., Zimmermann, B., Daniaux, M., Parson, W. (2009). Sequencing strategy for the whole mitochondrial genome resulting in high quality sequences. *BMC Genomics* 10:139.
45. Rani, D.S., Dhandapany, P.S., Nallari, P., Govindaraj, P., Singh, L., Thangaraj, K. (2010). Mitochondrial DNA haplogroup "R" is associated with Noonan syndrome of south India. *Mitochondrion* 10:166-173.
46. Tuo, Y., Hou, Q.F., Li, S.B. (2006). Direct Submission: Complete sequence of Mongol mitochondrial DNA. GenBank.
47. La Morgia, C., Achilli, A., Iommarini, L., Barboni, P., Pala, M., Olivieri, A., Zanna, C., Vidoni, S., Tonon, C., Lodi, R., et al. (2008). Rare mtDNA variants in Leber hereditary optic neuropathy families with recurrence of myoclonus. *Neurology* 70:762-770.
48. Ingman, M., Kaessmann, H., Pääbo, S., Gyllensten, U. (2000). Mitochondrial genome variation and the origin of modern humans. *Nature* 408:708-713.
49. Côrte-Real, H.B.S.M., Macaulay, V.A., Richards, M.B., Hariti, G., Issad, M.S., Cambon-Thomsen, A., Papiha, S., Bertranpetit, J., Sykes, B.C. (1996). Genetic diversity in the Iberian peninsula determined from mitochondrial sequence analysis. *Ann. Hum. Genet.* 60:331-350.
50. Plaza, S., Calafell, F., Helal, A., Bouzerna, N., Lefranc, G., Bertranpetit, J., Comas, D. (2003). Joining the pillars of Hercules: mtDNA sequences show multidirectional gene flow in the western Mediterranean. *Ann. Hum. Genet.* 67:312-328.
51. Watson, E., Forster, P., Richards, M., Bandelt, H.-J. (1997). Mitochondrial footprints of human expansions in Africa. *Am. J. Hum. Genet.* 61:691-704.
52. Stevanovitch, A., Gilles, A., Bouzaid, E., Kefi, R., Paris, F., Gayraud, R.P., Spadoni, J.L., El-Chenawi, F., Béraud-Colomb, E. (2004). Mitochondrial DNA sequence diversity in a sedentary population from Egypt. *Ann. Hum. Genet.* 68:23-39.
53. Coudray, C., Olivieri, A., Achilli, A., Pala, M., Melhaoui, M., Cherkaoui, M., El-Chennawi, F., Kossmann, M., Torroni, A., Dugoujon, J.M. (2009). The complex and diversified mitochondrial gene pool of Berber populations. *Ann. Hum. Genet.* 73:196-214.
54. Saunier, J.L., Irwin, J.A., Strouss, K.M., Ragab, H., Sturk, K.A., Parsons, T.J. (2009). Mitochondrial control region sequences from an Egyptian population sample. *Forensic Sci. Int. Genet.* 3:e97-103.
55. Thomas, M., Weale, M.E., Jones, A.L., Richards, M., Skorecki, K., Torroni, A., Scozzari, R., Gratrix, F., Bradman, N., Goldstein, D.B. (2002). Geographically separated Jewish groups were independently founded by very few female ancestors. *Am. J. Hum. Genet.* 70:1411-1420.
56. Rando, J.C., Pinto, F., González, A.M., Hernández, M., Larruga, J.M., Cabrera, V.M., Bandelt, H.-J. (1998). Mitochondrial DNA analysis of Northwest African populations reveals genetic exchanges with European, Near-Eastern, and sub-Saharan populations. *Ann. Hum. Genet.* 62:531-550.

57. Falchi, A., Giovannoni, L., Calo, C.M., Piras, I.S., Moral, P., Paoli, G., Vona, G., Varesi, L. (2006). Genetic history of some western Mediterranean human isolates through mtDNA HVR1 polymorphisms. *J. Hum. Genet.* 51:9-14.
58. Turchi, C., Buscemi, L., Giacchino, E., Onofri, V., Fendt, L., Parson, W., Tagliabracci, A. (2009). Polymorphisms of mtDNA control region in Tunisian and Moroccan populations: an enrichment of forensic mtDNA databases with Northern Africa data. *Forensic Sci. Int. Genet.* 3:166-172.
59. Pereira, L., Macaulay, V., Torroni, A., Scozzari, R., Prata, M.J., Amorim, A. (2001). Prehistoric and historic traces in the mtDNA of Mozambique: insights into the Bantu expansions and the slave trade. *Ann. Hum. Genet.* 65:439-458.
60. Vigilant, L., Stoneking, M., Harpending, H., Hawkes, K., Wilson, A.C. (1991). African populations and the evolution of human mitochondrial DNA. *Science* 253:1503-1507.
61. Graven, L., Passarino, G., Semino, O., Boursot, P., Santachiara-Benerecetti, S., Langaney, A., Excoffier, L. (1995). Evolutionary correlation between control region sequence and restriction polymorphisms in the mitochondrial genome of a large Senegalese Mandenka sample. *Mol Biol Evol* 12:334-345.
62. FBI (2012). FBI DNA database.
63. Krings, M., Salem, A.H., Bauer, K., Geisert, H., Malek, A., Chaix, L., Simon, C., Welsby, D., Di Rienzo, A., Utermann, G., et al. (1999). mtDNA analysis of Nile River Valley populations: a genetic corridor or a barrier to migration? *Am. J. Hum. Genet.* 64:1166-1176.
64. Fadhlouli-Zid, K., Plaza, S., Calafell, F., Ben Amor, M., Comas, D., Bennamar El gaaied, A. (2004). Mitochondrial DNA heterogeneity in Tunisian Berbers. *Ann. Hum. Genet.* 68:222-233.
65. Irwin, J.A., Ikramov, A., Saunier, J., Bodner, M., Amory, S., Röck, A., O'Callaghan, J., Nuritdinov, A., Atakhodjaev, S., Mukhamedov, R., et al. (2010). The mtDNA composition of Uzbekistan: a microcosm of Central Asian patterns. *Int. J. Legal Med.* 124:195-204.
66. Horai, S., Murayama, K., Hayasaka, K., Matsubayashi, S., Hattori, Y., Fucharoen, G., Harihara, S., Park, K.S., Omoto, K., Pan, I.-H. (1996). mtDNA polymorphism in East Asia populations, with special reference to the peopling of Japan. *Am. J. Hum. Genet.* 59:579-590.
67. Lum, J.K., Cann, R.L., Martinson, J.J., Jorde, L.B. (1998). Mitochondrial and nuclear genetic relationships among Pacific island and Asian populations. *Am. J. Hum. Genet.* 63:613-624.
68. Melton, T., Clifford, S., Martinson, J., Batzer, M., Stoneking, M. (1998). Genetic evidence for the proto-Austronesian homeland in Asia: mtDNA and nuclear DNA variation in Taiwanese aboriginal tribes. *Am. J. Hum. Genet.* 63:1807-1823.
69. Nishimaki, Y., Sato, K., Fang, L., Ma, M., Hasekura, H., Boettcher, B. (1999). Sequence polymorphism in the HV1 region in Japanese and Chinese. *Legal Medicine* 1:238-249.
70. Kivisild, T., Tolk, H.-V., Parik, J., Wang, Y., Papiha, S.S., Bandelt, H.-J., Villems, R. (2002). The emerging limbs and twigs of the East Asian mtDNA tree. *Mol. Biol. Evol.* 19:1737-1751 (erratum 1720:1162).
71. Yao, Y.-G., Kong, Q.-P., Bandelt, H.-J., Kivisild, T., Zhang, Y.-P. (2002). Phylogeographic differentiation of mitochondrial DNA in Han Chinese. *Am. J. Hum. Genet.* 70:635-651.
72. Yao, Y.-G., Nie, L., Harpending, H., Fu, Y.-X., Yuan, Z.-G., Zhang, Y.-P. (2002). Genetic relationship of Chinese ethnic populations revealed by mtDNA sequence diversity. *Am. J. Phys. Anthropol.* 118:63-76.
73. Yao, Y.-G., Zhang, Y.-P. (2002). Phylogeographic analysis of mtDNA variation in four ethnic populations from Yunnan Province: new data and a reappraisal. *J. Hum. Genet.* 47:311-318.
74. Yao, Y.-G., Kong, Q.-P., Wang, C.-Y., Zhu, C.-L., Zhang, Y.-P. (2004). Different matrilineal contributions to genetic structure of ethnic groups in the Silk Road region in China. *Mol. Biol. Evol.* 21:2265-2280.
75. Irwin, J.A., Saunier, J.L., Beh, P., Strouss, K.M., Paintner, C.D., Parsons, T.J. (2009). Mitochondrial DNA control region variation in a population sample from Hong Kong, China. *Forensic Sci. Int. Genet.* 3:e119-125.
76. Chen, F., Wang, S.Y., Zhang, R.Z., Hu, Y.H., Gao, G.F., Liu, Y.H., Kong, Q.P. (2008). Analysis of mitochondrial DNA polymorphisms in Guangdong Han Chinese. *Forensic Sci. Int. Genet.* 2:150-153.
77. Kivisild, T., Bamshad, M.J., Kaldma, K., Metspalu, M., Metspalu, E., Reidla, M., Laos, S., Parik, J., Watkins, W.S., Dixon, M.E., et al. (1999). Deep common ancestry of Indian and western Eurasian mtDNA lineages. *Curr. Biol.* 9:1331-1334.

78. Roychoudhury, S., Roy, S., Basu, A., Banerjee, R., Vishwanathan, H., Usha Rani, M.V., Sil, S.K., Mitra, M., Majumder, P.P. (2001). Genomic structures and population histories of linguistically distinct tribal groups of India. *Hum. Genet.* 109:339-350.
79. Cordaux, R., Saha, N., Bentley, G.R., Auger, R., Sirajuddin, S.M., Stoneking, M. (2003). Mitochondrial DNA analysis reveals diverse histories of tribal populations from India. *Eur. J. Hum. Genet.* 11:253-264.
80. Metspalu, M., Kivisild, T., Metspalu E, Parik, J., Hudjashov, G., Kaldma, K., Serk, P., Karmin, M., Behar, D.M., Gilbert, M.T.P., et al. (2004). Most of the extant mtDNA boundaries in south and southwest Asia were likely shaped during the initial settlement of Eurasia by anatomically modern humans. *BMC Genet.* 5:26.
81. Quintana-Murci, L., Chaix, R., Wells, R.S., Behar, D.M., Sayar, H., Scozzari, R., Rengo, C., Al-Zahery, N., Semino, O., Santachiara-Benerecetti, A.S., et al. (2004). Where west meets east: the complex mtDNA landscape of the southwest and Central Asian corridor. *Am. J. Hum. Genet.* 74:827-845.
82. Fornarino, S., Pala, M., Battaglia, V., Maranta, R., Achilli, A., Modiano, G., Torroni, A., Semino, O., Santachiara-Benerecetti, S.A. (2009). Mitochondrial and Y-chromosome diversity of the Tharus (Nepal): a reservoir of genetic variation. *BMC Evol. Biol.* 9:154.
83. Mountain, J.L., Hebert, J.M., Bhattacharyya, S., Underhill, P.A., Ottolenghi, C., Gadgil, M., Cavalli-Sforza, L.L. (1995). Demographic history of India and mtDNA sequence diversity. *Am J Hum Genet* 56:979-992.
84. Bamshad, M.J., Watkins, W.S., Dixon, M.E., Jorde, L.B., Bhaskara Rao, B., Naidu, J.M., Ravi Prasad, B.V., Rasanayagam, A., Hammer, M.F. (1998). Female gene flow statifies Hindu castes. *Nature* 395:651-652.
85. Comas, D., Calafell, F., Mateu, E., Pérez-Lezaun, A., Bosch, E., Martínez-Arias, R., Clarimon, J., Facchini, F., Fiori, G., Luiselli, D., et al. (1998). Trading genes along the Silk Road: mtDNA sequences and the origin of central Asian populations. *Am. J. Hum. Genet.* 63:1824-1838.
86. Yao, Y.G., Lu, X.M., Luo, H.R., Li, W.H., Zhang, Y.P. (2000). Gene admixture in the Silk Road region of China: evidence from mtDNA and melanocortin1 receptor polymorphism. *Genes Genet. Syst.* 75:173.
87. Yao, Y.G., Watkins, W.S., Zhang, Y.P. (2000). Evolutionary history of the mtDNA 9-bp deletion in Chinese populations and its relevance to the peopling of east and southeast Asia. *Hum. Genet.* 107:504-512.
88. Kolman, C., Sambuughin, N., Bermingham, E. (1996). Mitochondrial DNA analysis of Mongolian populations and implications for the origin of New World founders. *Genetics* 142:1321-1334.
89. Shields, G.F., Schmiechen, A.M., Frazier, B.L., Redd, A., Voevoda, M.I., Reed, J.K., Ward, R.H. (1993). mtDNA sequences suggest a recent evolutionary divergence for Beringian and northern North American populations. *Am. J. Hum. Genet.* 53:549-562.
90. Starikovskaya, Y.B., Sukernik, R.I., Schurr, T.G., Kogelnik, A.M., Wallace, D.C. (1998). mtDNA diversity in Chukchi and Siberian Eskimos: implications for the genetic history of ancient Beringia and the peopling of the New World. *Am. J. Hum. Genet.* 63:1473-1491.
91. Schurr, T.G., Sukernik, R.I., Starikovskaya, Y.B., Wallace, D.C. (1999). Mitochondrial DNA variation in Koryaks and Itel'men: Population replacement in the Okhotsk Sea Bering Sea region during the Neolithic. *Am. J. Phys. Anthropol.* 108:1-39.
92. Richards, M., Macaulay, V., Hickey, E., Vega, E., Sykes, B., Guida, V., Rengo, C., Sellitto, D., Cruciani, F., Kivisild, T., et al. (2000). Tracing European founder lineages in the Near Eastern mitochondrial gene pool. *Am. J. Hum. Genet.* 67:1251-1276.
93. Comas, D., Calafell, F., Bendukidze, N., Fañanás, L., Bertranpetit, J. (2000). Georgian and Kurd mtDNA sequence analysis shows a lack of correlation between languages and female genetic lineages. *Am. J. Phys. Anthropol.* 112:5-16.
94. Alfonso-Sánchez, M.A., Martínez-Bouzas, C., Castro, A., Peña, J.A., Fernández-Fernández, I., Herrera, R.J., de Pancorbo, M.M. (2006). Sequence polymorphisms of the mtDNA control region in a human isolate: the Georgians from Swanetia. *J. Hum. Genet.* 51:429-439.
95. Malyarchuk, B.A., Grzybowski, T., Derenko, M.V., Czarny, J., Drobnic, K., Miścicka-Sliwka, D. (2003). Mitochondrial DNA variability in Bosnians and Slovenians. *Ann. Hum. Genet.* 67: 412-425.

96. Karachanak, S., Carossa, V., Nesheva, D., Olivieri, A., Pala, M., Hooshar Kashani, B., Grugni, V., Battaglia, V., Achilli, A., Yordanov, Y., et al. (2011). Bulgarians vs the other European populations: a mitochondrial DNA perspective. *Int. J. Legal Med.* [Epub ahead of print]
97. Vernesi, C., Di Benedetto, G., Caramelli, D., Secchieri, E., Simoni, L., Katti, E., Malaspina, P., Novelletto, A., Marin, V.T., Barbujani, G. (2001). Genetic characterization of the body attributed to the evangelist Luke. *Proc. Natl. Acad. Sci. USA* 98:13460-13463.
98. Babalini, C., Martínez-Labarga, C., Tolk, H.V., Kivisild, T., Giampaolo, R., Tarsi, T., Contini, I., L., B., Jančićjević, B., Martinović Klarić, I., et al. (2005). The population history of the Croatian linguistic minority of Molise (southern Italy): a maternal view. *Eur. J. Hum. Genet.* 13:902-912.
99. Irwin, J., Saunier, J., Strouss, K., Paintner, C., Diegoli, T., Sturk, K., Kovatsi, L., Brandstätter, A., Cariolou, M.A., Parson, W., et al. (2008). Mitochondrial control region sequences from northern Greece and Greek Cypriots. *Int. J. Legal Med.* 122:87-89.
100. Brandstätter, A., Egyed, B., Zimmermann, B., Duftner, N., Padar, Z., Parson, W. (2007). Migration rates and genetic structure of two Hungarian ethnic groups in Transylvania, Romania. *Ann. Hum. Genet.* 71:791-803.
101. Irwin, J., Egyed, B., Saunier, J., Szamosi, G., O'Callaghan, J., Padar, Z., Parsons, T.J. (2007). Hungarian mtDNA population databases from Budapest and the Baranya county Roma. *Int. J. Legal Med.* 121:377-383.
102. Zimmermann, B., Brandstätter, A., Duftner, N., Niederwieser, D., Spiroski, M., Arsov, T., Parson, W. (2007). Mitochondrial DNA control region population data from Macedonia. *Forensic Sci. Int. Genet.* 1:e4-9.
103. Malyarchuk, B.A., Grzybowski, T., Derenko, M.V., Czarny, J., Woźniak, M., Miścicka-Sliwka, D. (2002). Mitochondrial DNA variability in Poles and Russians. *Ann. Hum. Genet.* 66:261-283.
104. Grzybowski, T., Malyarchuk, B.A., Derenko, M.V., Perkova, M.A., Bednarek, J., Woźniak, M. (2007). Complex interactions of the Eastern and Western Slavic populations with other European groups as revealed by mitochondrial DNA analysis. *Forensic Sci. Int. Genet.* 1:141-147.
105. Malyarchuk, B.A., Derenko, M.V. (2001). Mitochondrial DNA variability in Russians and Ukrainians: implication to the origin of the Eastern Slavs. *Ann. Hum. Genet.* 65:63-78.
106. Orekhov, V., Poltoraus, A., Zhivotovsky, L.A., Spitsyn, V., Ivanov, P., Yankovsky, N. (1999). Mitochondrial DNA sequence diversity in Russians. *FEBS Letters* 445:197-201.
107. Metspalu, E., Kivisild, T., Kaldma, K., Reidla, M., Villems, R. (1998). Direct submission. GenBank
108. Lehocký, I., Baldovic, M., Kádasi, L., Metspalu, E. (2008). A database of mitochondrial DNA hypervariable regions I and II sequences of individuals from Slovakia. *Forensic Sci. Int. Genet.* 2:e53-59.
109. Parson, W., Parsons, T.J., Scheithauer, R., Holland, M.M. (1998). Population data for 101 Austrian Caucasian mitochondrial DNA D-loop sequences: application of mtDNA sequence analysis to a forensic case. *Int. J. Legal Med.* 111:124-132.
110. Brandstätter, A., Niederstätter, H., Pavlic, M., Grubwieser, P., Parson, W. (2007). Generating population data for the EMPOP database - an overview of the mtDNA sequencing and data evaluation processes considering 273 Austrian control region sequences as example. *Forensic Sci. Int.* 166:164-175.
111. Picornell, A., Gómez-Barbeito, L., Tomàs, C., Castro, J.A., Ramon, M.M. (2005). Mitochondrial DNA HVRI variation in Balearic populations. *Am. J. Phys. Anthropol.* 128:119-130.
112. Bertranpetit, J., Sala, J., Calafell, F., Underhill, P.A., Moral, P., Comas, D. (1995). Human mitochondrial DNA variation and the origin of Basques. *Ann. Hum. Genet.* 59:63-81.
113. Richard, C., Pennarun, E., Kivisild, T., Tambets, K., Tolk, H.V., Metspalu, E., Reidla, M., Chevalier, S., Giraudet, S., Lauc, L.B., et al. (2007). An mtDNA perspective of French genetic variation. *Ann Hum Biol* 34:68-79.
114. Alfonso-Sánchez, M.A., Cardoso, S., Martínez-Bouzas, C., Peña, J.A., Herrera, R.J., Castro, A., Fernández-Fernández, I., De Pancorbo, M.M. (2008). Mitochondrial DNA haplogroup diversity in Basques: a reassessment based on HVI and HVII polymorphisms. *Am. J. Hum. Biol.* 20:154-164.



115. Decorte, R., Jehaes, E., Xiao, F.X., Cassiman, J.J. (1996). Genetic analysis of single hair shafts by automated sequence analysis of the mitochondrial D-loop region. In: Carracedo, A., Brinkmann, B., Bär, W. (eds) *Advances in Forensic Haemogenetics 6*. Springer-Verlag, Berlin, pp 17-19.
116. Varesi, L., Memmi, M., Cristofari, M.C., Mameli, G.E., Calò, C.M., Vona, G. (2000). Mitochondrial control-region sequence variation in the Corsican population, France. *Am. J. Hum. Biol.* **12**:339-351.
117. Lahermo, P., Sajantila, A., Sistonen, P., Lukka, M., Aula, P., Peltonen, L., Savontaus, M.L. (1996). The genetic relationship between the Finns and the Finnish Saami (Lapps) - analysis of nuclear DNA and mtDNA. *Am. J. Hum. Genet.* **58**:1309-1322.
118. Hedman, M., Brandstätter, A., Pimenoff, V., Sistonen, P., Palo, J.U., Parson, W., Sajantila, A. (2007). Finnish mitochondrial DNA HVS-I and HVS-II population data. *Forensic Sci. Int.* **172**:171-178.
119. Rousselet, F., Mangin, P. (1998). Mitochondrial DNA polymorphisms: a study of 50 French Caucasian individuals and application to forensic casework. *Int. J. Legal Med.* **111**:292-298.
120. Dubut, V., Chollet, L., Murail, P., Cartault, F., Béraud-Colomb, E., Serre, M., Mogentale-Profizi, N. (2004). MtDNA polymorphisms in five French groups: importance of regional sampling. *Eur. J. Hum. Genet.* **12**:293-300.
121. Richards, M., Côté-Real, H., Forster, P., Macaulay, V., Wilkinson-Herbots, H., Demaine, A., Papiha, S., Hedges, R., Bandelt, H.-J., Sykes, B. (1996). Paleolithic and Neolithic lineages in the European mitochondrial gene pool. *Am. J. Hum. Genet.* **59**:185-203.
122. Hofmann, S., Jaksch, M., Bezold, R., Mertens, S., Aholt, S., Paprotta, A., Gerbitz, K.D. (1997). Population genetics and disease susceptibility: characterization of central European haplogroups by mtDNA gene mutations, correlations with D loop variants and association with disease. *Hum. Mol. Genet.* **6**:1835-1846.
123. Baasner, A., Schäfer, C., Junge, A., Madea, B. (1998). Polymorphic sites in human mitochondrial DNA control region sequences: population data and maternal inheritance. *Forensic Sci. Int.* **98**:169-178.
124. Pfeiffer, H., Brinkmann, B., Huhne, J., Rolf, B., Morris, A.A., Steighner, R., Holland, M.M., Forster, P. (1999). Expanding the forensic German mitochondrial DNA database: genetic diversity as a function of sample size and microgeography. *Int. J. Legal Med.* **112**:291-298.
125. Tetzlaff, S., Brandstätter, A., Wegener, R., Parson, W., Weirich, V. (2007). Mitochondrial DNA population data of HVS-I and HVS-II sequences from a northeast German sample. *Forensic Sci. Int.* **172**:218-224.
126. Lutz, S., Weisser, H.-J., Heizmann, J., Pollak, S. (1998). Location and frequency of polymorphic positions in the mtDNA control region of individuals from Germany. *Int. J. Legal Med.* **112**:145-150.
127. Brandstätter, A., Klein, R., Duftner, N., Wiegand, P., Parson, W. (2006). Application of a quasi-median network analysis for the visualization of character conflicts to a population sample of mitochondrial DNA control region sequences from southern Germany (Ulm). *Int. J. Legal Med.* **120**:310-314.
128. McEvoy, B., Richards, M., Forster, M., Bradley, D.G. (2004). The *longue duree* of genetic ancestry: Multiple genetic marker systems and Celtic origins on the Atlantic facade of Europe. *Am. J. Hum. Genet.* **75**:693-702.
129. Francalacci, P., Bertranpetit, J., Calafell, F., Underhill, P.A. (1996). Sequence diversity of the control region of mitochondrial DNA in Tuscany and its implications for the peopling of Europe. *Am. J. Phys. Anthropol.* **100**:443-460.
130. Achilli, A., Olivieri, A., Pala, M., Metspalu, E., Fornarino, S., Battaglia, V., Accetturo, M., Kutuev, I., Khusnutdinova, E., Pennarun, E., et al. (2007). Mitochondrial DNA variation of modern Tuscans supports the Near Eastern origin of Etruscans. *Am. J. Hum. Genet.* **80**:759-768.
131. Turchi, C., Buscemi, L., Previderè, C., Grignani, P., Brandstätter, A., Achilli, A., Parson, W., Tagliabracci, A., Group, G.F.I. (2008). Italian mitochondrial DNA database: results of a collaborative exercise and proficiency testing. *Int. J. Legal Med.* **122**:199-204.
132. Vernesi, C., Fuselli, S., Castri, L., Bertorelle, G., Barbujani, G. (2002). Mitochondrial diversity in linguistic isolates of the Alps: a reappraisal. *Human Biology* **74**:725-730.
133. Vona, G., Ghiani, M.E., Calò, C.M., Vacca, L., Memmi, M., Varesi, L. (2001). Mitochondrial DNA sequence analysis in Sicily. *Am. J. Hum. Biol.* **13**: 576-589.
134. Helgason, A., Sigurðardóttir, S., Gulcher, J.R., Ward, R., Stefánsson, K. (2000). MtDNA and the origin of the Icelanders: deciphering signals of recent population history. *Am. J. Hum. Genet.* **66**:999-1016.

135. Helgason, A., Hickey, E., Goddacre, S., Bosnes, V., Stefansson, K., Ward, R., Sykes, B. (2001). mtDNA and the islands of the North Atlantic: estimating the proportions of Norse and Gaelic ancestry. *Am. J. Hum. Genet.* 68:723-737.
136. Pereira, L., Prata, M.J., Amorim, A. (2000). Diversity of mtDNA lineages in Portugal: not a genetic edge of European variation. *Ann. Hum. Genet.* 64:491-506.
137. González, A.M., Brehm, A., Pérez, J.A., Maca-Meyer, N., Flores, C., Cabrera, V.M. (2003). Mitochondrial DNA affinities at the Atlantic fringe of Europe. *Am. J. Phys. Anthropol.* 120:391-404.
138. Sajantila, A., Lahermo, P., Anttinen, T., Lukka, M., Sistonen, P., Savontaus, M.L., Aula, P., Beckman, L., Tranebjaerg, L., Geddedahl, T., et al. (1995). Genes and languages in Europe—an analysis of mitochondrial lineages. *Genome Res.* 5:42-52.
139. Delghandi, M., Utsi, E., Krauss, S. (1998). Saami mitochondrial DNA reveals deep maternal lineage clusters. *Hum Hered* 48:108-114.
140. Di Rienzo, A., Wilson, A.C. (1991). Branching pattern in the evolutionary tree for human mitochondrial DNA. *Proc. Natl. Acad. Sci. U. S. A.* 88:1597-1601.
141. Larruga, J.M., Díez, F., Pinto, F.M., Flores, C., González, A.M. (2001). Mitochondrial DNA characterisation of European isolates: the Maragatos from Spain. *Eur. J. Hum. Genet.* 9:708-716.
142. Crespillo, M., Luque, J.A., Paredes, M., Fernández, R., Ramírez, E., Valverde, J.L. (2000). Mitochondrial DNA sequences for 118 individuals from northeastern Spain. *Int. J. Legal Med.* 114:130-132.
143. Alvarez-Iglesias, V., Mosquera-Miguel, A., Cerezo, M., Quintáns, B., Zarrabeitia, M.T., Cuscó, I., Lareu, M.V., García, O., Pérez-Jurado, L., Carracedo, A., et al. (2009). New population and phylogenetic features of the internal variation within mitochondrial DNA macro-haplogroup R0. *PLoS ONE* 4:e5112.
144. Salas, A., Comas, D., Lareu, M.V., Bertranpetit, J., Carracedo, A. (1998). mtDNA analysis of the Galician population: a genetic edge of European variation. *Eur. J. Hum. Genet.* 6:365-375.
145. Pult, I., Sajantila, A., Simanainen, J., Georgiev, O., Schaffner, W., Pääbo, S. (1994). Mitochondrial DNA sequences from Switzerland reveal striking homogeneity of European populations. *Biol. Chem. Hoppe Seyler* 375:837-840.
146. Dimo-Simonin, N., Grange, F., Taroni, F., Brandt-Casadevall, C., Mangin, P. (2000). Forensic evaluation of mtDNA in a population from south west Switzerland. *Int. J. Legal Med.* 113: 89-97.
147. Macaulay, V., Richards, M., Hickey, E., Vega, E., Cruciani, F., Guida, V., Scozzari, R., Bonnè-Tamir, B., Sykes, B., Torroni, A. (1999). The emerging tree of West Eurasian mtDNAs: a synthesis of control-region sequences and RFLPs. *Am. J. Hum. Genet.* 64:232-249.
148. Shlush, L.I., Behar, D.M., Yudkovsky, G., Templeton, A., Hadid, Y., Basis, F., Hammer, M., Itzkovitz, S., Skorecki, K. (2008). The Druze: a population genetic refugium of the Near East. *PLoS One* 3:e2105.
149. Al-Zahery, N., Pala, M., Battaglia, V., Grugni, V., Hamod, M.A., Hooshiar Kashani, B.H., Olivieri, A., Torroni, A., Santachiara-Benerecetti, A.S., Semino, O. (2011). In search of the genetic footprints of Sumerians: a survey of Y-chromosome and mtDNA variation in the Marsh Arabs of Iraq. *BMC Evol. Biol.* 11:288.
150. González, A.M., Karadsheh, N., Maca-Meyer, N., Flores, C., Cabrera, V.M., Larruga, J.M. (2008). Mitochondrial DNA variation in Jordanians and their genetic relationship to other Middle East populations. *Ann Hum Biol* 35:212-231.
151. Di Benedetto, G., Ergüven, A., Stenico, M., Castrì, L., Bertorelle, G., Togan, I., Barbujani, G. (2001). DNA diversity and population admixture in Anatolia. *Am. J. Phys. Anthropol.* 115:144-156.
152. Abu-Amero, K.K., Larruga, J.M., Cabrera, V.M., González, A.M. (2008). Mitochondrial DNA structure in the Arabian Peninsula. *BMC Evol. Biol.* 8:45.
153. Alshamali, F., Brandstätter, A., Zimmermann, B., Parson, W. (2008). Mitochondrial DNA control region variation in Dubai, United Arab Emirates. *Forensic Sci. Int. Genet.* 2:e9-10.
154. Cerny, V., Mulligan, C.J., Ridl, J., Zaloudkova, M., Edens, C.M., Hajek, M., Pereira, L. (2008). Regional differences in the distribution of the sub-Saharan, West Eurasian, and South Asian mtDNA lineages in Yemen. *Am. J. Phys. Anthropol.* 136:128-137.
